# Supplementary material for: Effects of transcranial direct current stimulation (tDCS) and concurrent cognitive training on episodic memory in patients with traumatic brain injury: a double-blind, randomised, placebo-controlled study
Source: PubMed Central journal article supplement (PMC8395342; doi:10.1136/bmjopen-2020-045285), 2021-08-26
Supplement: bmjopen-2020-045285.draft_revisions.pdf [file bmjopen-2020-045285.draft_revisions.pdf]

# BMJ Open

BMJ Open is committed to open peer review. As part of this commitment we make the peer review history of every article we publish publicly available.

When an article is published we post the peer reviewers' comments and the authors' responses online. We also post the versions of the paper that were used during peer review. These are the versions that the peer review comments apply to.

The versions of the paper that follow are the versions that were submitted during the peer review process. They are not the versions of record or the final published versions. They should not be cited or distributed as the published version of this manuscript.

BMJ Open is an open access journal and the full, final, typeset and author-corrected version of record of the manuscript is available on our site with no access controls, subscription charges or pay-per-view fees (<http://bmjopen.bmj.com>).

If you have any questions on BMJ Open's open peer review process please email [info.bmjopen@bmj.com](mailto:info.bmjopen@bmj.com)

# BMJ Open

## The effects of transcranial direct current stimulation (tDCS) and cognitive training on episodic memory in patients with traumatic brain injury: a double-blind, randomized, placebo-controlled study

|                               |                                                                                                                                                                                                                                                                                                                                                                                                                                                                                                                                                                                                                                                                                                                       |
|-------------------------------|-----------------------------------------------------------------------------------------------------------------------------------------------------------------------------------------------------------------------------------------------------------------------------------------------------------------------------------------------------------------------------------------------------------------------------------------------------------------------------------------------------------------------------------------------------------------------------------------------------------------------------------------------------------------------------------------------------------------------|
| Journal:                      | <i>BMJ Open</i>                                                                                                                                                                                                                                                                                                                                                                                                                                                                                                                                                                                                                                                                                                       |
| Manuscript ID                 | bmjopen-2020-045285                                                                                                                                                                                                                                                                                                                                                                                                                                                                                                                                                                                                                                                                                                   |
| Article Type:                 | Protocol                                                                                                                                                                                                                                                                                                                                                                                                                                                                                                                                                                                                                                                                                                              |
| Date Submitted by the Author: | 26-Sep-2020                                                                                                                                                                                                                                                                                                                                                                                                                                                                                                                                                                                                                                                                                                           |
| Complete List of Authors:     | DE FREITAS, DAGLIE; HCFMUSP, Neurology/Neurosurgery<br>Zaninotto, Ana Luiza; MGH Institute of Health Professions, Speech and Feeding Disorders Lab<br>Brunoni, Andre; University of São Paulo, Division of Psychiatry and Psychology<br>Paiva, Wellingson; University of São Paulo, Division of Neurosurgery<br>De Carvalho, Daniel; HCFMUSP, Neurology/Neurosurgery<br>Paglioni, Vanessa Maria; HCFMUSP, Neurology/Neurosurgery<br>Souza, Maria Sigride; University of Sao Paulo, Psychiatry Department<br>Valiengo, Leandro; University of Sao Paulo, Interdisciplinary Center for Applied Neuromodulation and Service of Interdisciplinary Neuromodulation<br>Guirado, Vinícius; HCFMUSP, Division of Neurosurgery |
| Keywords:                     | Neurological injury < NEUROLOGY, Rehabilitation medicine < INTERNAL MEDICINE, Clinical trials < THERAPEUTICS                                                                                                                                                                                                                                                                                                                                                                                                                                                                                                                                                                                                          |
|                               |                                                                                                                                                                                                                                                                                                                                                                                                                                                                                                                                                                                                                                                                                                                       |

SCHOLARONE™  
Manuscripts

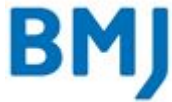

I, the Submitting Author has the right to grant and does grant on behalf of all authors of the Work (as defined in the below author licence), an exclusive licence and/or a non-exclusive licence for contributions from authors who are: i) UK Crown employees; ii) where BMJ has agreed a CC-BY licence shall apply, and/or iii) in accordance with the terms applicable for US Federal Government officers or employees acting as part of their official duties; on a worldwide, perpetual, irrevocable, royalty-free basis to BMJ Publishing Group Ltd ("BMJ") its licensees and where the relevant Journal is co-owned by BMJ to the co-owners of the Journal, to publish the Work in this journal and any other BMJ products and to exploit all rights, as set out in our [licence](#).

The Submitting Author accepts and understands that any supply made under these terms is made by BMJ to the Submitting Author unless you are acting as an employee on behalf of your employer or a postgraduate student of an affiliated institution which is paying any applicable article publishing charge ("APC") for Open Access articles. Where the Submitting Author wishes to make the Work available on an Open Access basis (and intends to pay the relevant APC), the terms of reuse of such Open Access shall be governed by a Creative Commons licence – details of these licences and which [Creative Commons](#) licence will apply to this Work are set out in our licence referred to above.

Other than as permitted in any relevant BMJ Author's Self Archiving Policies, I confirm this Work has not been accepted for publication elsewhere, is not being considered for publication elsewhere and does not duplicate material already published. I confirm all authors consent to publication of this Work and authorise the granting of this licence.

1  
2  
3 **The effects of transcranial direct current stimulation (tDCS) and cognitive training**  
4 **on episodic memory in patients with traumatic brain injury: a double-blind,**  
5 **randomized, placebo-controlled study**  
6  
7

8 Dagliê Jorge de Freitas<sup>1</sup>, Daniel de Carvalho<sup>1</sup>, Vanessa M. Paglioni<sup>1</sup>, Andre R. Brunoni<sup>2,3</sup>,  
9 Leandro Valiengo<sup>2,3</sup>, Sigride Thome-Souza<sup>4</sup>, Vinicius Monteiro de Paula Guirado<sup>1</sup>, Ana  
10 Luiza Zaninotto<sup>1,5\*</sup>, Wellingson S. Paiva<sup>1\*</sup>  
11

12 \*Sharing the last authorship.  
13

- 14  
15 1. Department of Neurology/ Neurosurgery, Clinics Hospital, Medical School of  
16 University of Sao Paulo (HC-FMUSP), Brazil.  
17 2. Interdisciplinary Center for Applied Neuromodulation and Service of  
18 Interdisciplinary Neuromodulation, LIM-27, University of São Paulo, Brazil  
19 3. Departments of Internal Medicine and Psychiatry, Faculdade de Medicina da  
20 Universidade de São Paulo, Brazil  
21 4. Service of video-electroencephalography, Psychiatry Department, School of  
22 Medicine, University of Sao Paulo, Sao Paulo, Brazil.  
23 5. Speech and Feeding Disorders Lab, MGH Institute of Health Professions  
24 (MGHIHP), Boston, USA.  
25  
26  
27  
28  
29

30 Word count: 2918  
31

32  
33 Corresponding author:

34 Ana Luiza Zaninotto  
35 79/96 13<sup>th</sup> street, 2<sup>nd</sup> floor.  
36 Boston, MA, United States  
37 02129  
38

39 Correspondence: [acostazaninotto@mghihp.edu](mailto:acostazaninotto@mghihp.edu)  
40  
41  
42  
43  
44  
45  
46  
47  
48  
49  
50  
51  
52  
53  
54  
55  
56  
57  
58  
59  
60

## ABSTRACT

**Introduction:** Deficits in episodic memory following traumatic brain injury (TBI) are common and affect independence in activities of daily living. Concomitant transcranial direct current stimulation (tDCS) and cognitive outcomes may contribute to improve episodic memory in patients with TBI. Although previous studies have shown the potential benefits of tDCS to improve cognition, the benefits of the tDCS applied concomitantly with cognitive training are still inconsistent. This study aims to (1) investigate whether active tDCS combined with computer-assisted cognitive training enhances episodic memory compared to sham tDCS; (2) to compare the differences between active tDCS applied over the left dorsolateral prefrontal cortex (IDL PFC) and bilateral temporal cortex (BTC) on episodic memory; and (3) investigate inter and intra-group changes on cortical activity measured by quantitative electroencephalogram (qEEG).

**Methods and analysis:** A randomized, parallel-group, double-blind placebo-controlled study is conducted. Thirty-six participants with chronic, moderate, and severe closed TBI are being recruited. Participants are randomized into three parallel groups (1:1:1) based on the placement of tDCS sponges and activation (active or sham). TDCS is applied for 10 consecutive days for 20 minutes, concomitant to a computer-based memory and attention training. Cognitive scores and qEEG are collected at baseline, on the last day of the stimulation session, and 3 months after the last tDCS session. Based on previous studies we hypothesize that (1) memory scores in the active tDCS group will improve compared to the sham group; (2) memory scores will be higher after the BTC active tDCS compared to the IDL PFC; (3) there will be significant delta reduction and an increase in alpha waves close to the location of the active sponge placement compared to the sham group.

**Ethics and dissemination:** This study was approved by Hospital das Clínicas, University of São Paulo Ethical Institutional Review Board (number CAAE: 87954518.0.0000.0068)

**Trial registration number:** ClinicalTrials.gov(NCT04540783).

**Keywords:** traumatic brain injury, episodic memory, transcranial direct current stimulation, cognition, rehabilitation.

## ARTICLE SUMMARY

### Strengths and limitations of this study

- This protocol is the first randomized controlled trial investigating the effects of the concomitant transcranial direct current stimulation (tDCS) and computer-assisted cognitive training on episodic memory in individuals with TBI.
- This study may contribute to the development of evidence-based low-risk and low-cost rehabilitation treatments for TBI survivors with memory impairments.
- The location of the brain injury may bias the results, however, since all the participants also have diffuse axonal injury, we expect that the tDCS will act in a similar manner across the participants.

## INTRODUCTION

Traumatic Brain Injury (TBI) is an alteration in brain function caused by an external force and a major cause of death and disability throughout the world. (1,2) The hippocampus and the prefrontal cortex are among the brain structures more susceptible to lesions after a brain insult and, as a consequence, head injury survivors may experience difficulties in recalling specific events from the personal past and imagining novel scenarios. (3–5) Those regions are known to play important roles in episodic memory, which is a declarative memory containing information about place and time of acquisition as opposed to semantic memory, which refers to memory not tied to the context of encoding. (6) The hippocampus specifically organizes experienced and biographic memories that are defining features of episodic memory, and the pre-frontal cortex suppresses context-inappropriate memories thus allowing the retrieval of context-appropriate memories. (7) After brain trauma, cognitive impairment might be persistent (8) and no treatments available have been shown to be effective to improve those sequels.

Non-invasive brain stimulation (NIBS) techniques, including transcranial direct current stimulation (tDCS), are neuromodulatory interventions that have been shown to improve neuroplasticity and cognitive outcomes in neurological conditions, including TBI. (9,10) tDCS can transiently alter neuronal activity facilitating or inhibiting neuronal circuitries depending on the polarity of the stimulation. (11) tDCS induces neuroplasticity by applying a low-intensity electrical current (0.5 - 2 mA) through electrodes placed on the scalp. The electrodes have two polarities (anode and cathode) and change the resting state of the membrane cells of the surrounding region. (12,13) Previous studies have shown that repetitive tDCS sessions improved disorder of consciousness (11,14,15) and cognition in patients with TBI, (8,16) despite some studies have shown inconsistent results. (17–19)

1  
2  
3 Since tDCS works on the membrane level, changing the resting state but not  
4 evoking action potential, the use of cognitive training concomitant to the tDCS seems to  
5 be a good option to potentiate the stimulation and modulate the brain networks  
6 accordingly to the target training. (20–23) Two prior studies investigated the effects of  
7 the concomitant use of tDCS and offline cognitive training on memory and attention  
8 performance in TBI patients, but only one found a significant improvement in the  
9 cognitive outcome measures. (20,22)

10  
11  
12  
13  
14  
15  
16  
17  
18  
19  
20  
21  
22  
23  
24  
25  
26  
27  
28  
29  
30  
31  
32  
33  
34  
35  
36  
37  
38  
39  
40  
41  
42  
43  
44  
45  
46  
47  
48  
49  
50  
51  
52  
53  
54  
55  
56  
57  
58  
59  
60  
Biomarkers that evaluate brain changes after the tDCS intervention are still scarce,  
however the electroencephalogram (EEG) has been suggested to be a useful tool for this  
purpose. (24–29) The EEG measures the rhythm of electrical activity in the brain  
according to its frequency: Delta (1 - 4Hz), Theta (4 -8Hz), Alpha (8 - 12Hz) and Beta  
(12 - 30Hz) and Gamma (30 - 40Hz) (27,30,31) and is widely used as a safety outcome  
in patients who undergo tDCS sessions. (32–35) Some studies associate EEG measures  
(amplitude, power, phase and coherence) to the functionality of patients, (36) including  
the diagnosis and prognosis of patients with TBI. (37,38) A study using EEG power  
spectrum (39) suggests that, after 10 tDCS sessions, changes in the rhythm of brain  
activity occur, with reduction of delta and increase of alpha near the active electrodes in  
patients with chronic TBI. This study also found a significant correlation between  
decreases in delta and improved performance on neuropsychological tests for the active  
tDCS group to far greater extent than for the sham group. (24) Other studies have  
measured cortical activity after a single session of tDCS and have shown inconsistent  
results. (24–29) Thus, cortical changes after consecutive sessions of tDCS with  
concomitant cognitive training in people with TBI are still inconclusive.

Due to the lack of consensus and scarcity of evidence about the effects of cognitive  
training in addition to tDCS sessions in patients with TBI, the goals of this study are (a)



1  
2  
3 to investigate the effect of 10 sessions of concomitant tDCS and online cognitive training  
4 in patients with TBI compared to sham tDCS; (b) to analyze differences on episodic  
5 memory scores between active tDCS over IDLPF and BTC; (c) to analyze changes on  
6 cortical activities (measured by the EEG) between the groups. We hypothesize that (a)  
7 participants that received active stimulation will have greater scores on episodic memory  
8 test compared to the sham group; (b) active tDCS over the BTC will demonstrate higher  
9 episodic memory scores compared to the IDPFC; (c) delta reduction and an increase in  
10 alpha waves close to the of sponge placement in the active group compared to the sham  
11 group.  
12  
13  
14  
15  
16  
17  
18  
19  
20  
21  
22

## 23 **METHODS AND ANALYSIS**

### 24 **Design**

25  
26  
27 This study is a randomized, parallel-group, placebo-controlled and double-blind  
28 study that is being conducted at Hospital das Clínicas, University of São Paulo, (HC-  
29 FMUSP), São Paulo, Brazil. Participants who meet eligibility criteria are randomly  
30 allocated to (1) Group 1 - bilateral temporal cortex (BTC); (2) Group 2- left dorsolateral  
31 prefrontal cortex (IDL PFC); (3) Group 3 – sham (BTC/IDL PFC).  
32  
33  
34  
35  
36  
37  
38  
39  
40

41 Twenty-minute-tDCS for 10 days (2 weeks, except for Saturdays and Sundays) is  
42 delivered concomitant to the cognitive training. Patients will be assessed at baseline (T0),  
43 at the end of the last stimulation session (T1) and three months after the last tDCS session  
44 (T2). (Figure 1).  
45  
46  
47  
48  
49

### 50 **Ethics committee and regulatory approval**

51 The trial is conducted in accordance with the ethical principles outlined in the  
52 Declaration of Helsinki, 1996. This research was approved by the Hospital das Clínicas,  
53 University of São Paulo Ethical Institutional Review Board number CAAE:  
54  
55  
56  
57  
58  
59  
60

1  
2  
3 87954518.0.0000.0068. Clinical Trial number NCT04540783. Any severe side effect  
4 during the trial will be reported to the safety monitoring board IRB for appropriate  
5 management.  
6  
7  
8  
9

### 10 **Randomization and blinding**

11  
12  
13 The investigator ALZ was responsible for the computer-generated random  
14 assignment list, arranging patients in blocks of 3 or 6. The proportion of the  
15 randomization for each group is 1:1:1. This randomized list ensures double blinding so  
16 that both research assistants and patients are blind to the type of stimulation. Before each  
17 stimulation session, the researcher responsible for the stimulation receives a code that  
18 allows the tDCS device to deliver 20 minutes of active or sham stimulation. This blinding  
19 and methodological procedure is similar to the rational of previous studies. (20,22,24)  
20  
21  
22  
23  
24  
25  
26  
27  
28

29 The randomization list and the Neuroconn (tDCS device) code is kept inside a  
30 locked drawer with restricted access at the research coordination office at Hospital das  
31 Clínicas (HC-FMUSP).  
32  
33  
34  
35  
36

### 37 **Recruitment and study population**

38  
39 Thirty-six patients with TBI are being recruited from hospitals in São Paulo. All  
40 participants provide written informed consent and receive an exclusive identification  
41 number during the screening period, to ensure blinding. Study recruitment started in June  
42 2019 and the estimated completion date for the primary outcome is June 2022. We expect  
43 that 85% of the patients will be inpatients from HC-FMUSP referred by neurologists and  
44 15% from extra-mural recruitment (from social media and folders). This trial follows the  
45 CONSORT (Consolidated Standards of Reporting Trials) guidelines.  
46  
47  
48  
49  
50  
51  
52  
53  
54  
55  
56  
57  
58  
59  
60

### **Inclusion criteria**

- Outpatients with radiological diagnosis of TBI at least 6 months prior to enrollment in the study.
- Glasgow Coma Scale (GCS) score  $\leq$  12 at admission in the emergency room.
- Memory complaints, self-reported or reported by the family/ caregiver-.
- Age between 18 and 60 years.
- Able to follow directions.

### **Exclusion criteria**

- History of epilepsy post-TBI.
- Clinical EEG abnormalities (epileptiform activity, disorganized background , in other words, a general change in the way a normal brain wave looks – frequency, height and shape).
- Uncorrected visual impairment.
- Contraindications to tDCS, such as medical devices implanted in the brain or metallic foreign body in the head.
- Current severe/major depression (score over 36 points on the Beck Depression Inventory – 2<sup>nd</sup> edition).
- Current severe anxiety (score over 26 points on the Beck Anxiety Inventory).
- Limiting motor deficit.
- Estimated IQ under 70.

### **Patient and public involvement**

Patients are not involved in the design, or conduct, or reporting, or dissemination plans of our research.

## Instruments

Patients are expected to come to the research hospital for 11 visits as described in

Table 1.

Table 1: Detail of the study visits.

|                    | Tasks | Visit 1<br>Baseline | Visit<br>2-9 | Visit<br>10 | Visit 11<br>3 months<br>follow-up |
|--------------------|-------|---------------------|--------------|-------------|-----------------------------------|
| Consent Form       | X     |                     |              |             |                                   |
| Screening          |       |                     |              |             |                                   |
| Medical history    | X     |                     |              |             |                                   |
| qEEG               | X     |                     |              | X           | X                                 |
| BDI-II             | X     |                     |              | X           | X                                 |
| BAI                | X     |                     |              | X           | X                                 |
| Estimated IQ       | X     |                     |              |             |                                   |
| Episodic Memory    |       |                     |              |             |                                   |
| RAVLT              |       | X                   |              | X           | X                                 |
| Intervention       |       |                     |              |             |                                   |
| tDCS               |       | X                   | X            | X           |                                   |
| Cognitive Training |       | X                   | X            | X           |                                   |
| AEQ                |       | X                   | X            | X           |                                   |

Legend: AEQ – Adverse Events Questionnaire; BAI - Beck Anxiety Inventory; BDI-II - Beck Depression Inventory; qEEG – Quantitative Electroencephalogram; IQ – Intelligence quotient, tDCS – Transcranial Direct Current Stimulation, RAVLT - Rey Auditory Verbal Learning Test.

### Screening assessment:

Depressive symptoms - BDI-II - Beck Depression Inventory (40)

Anxiety symptoms - BAI - Beck Anxiety Inventory (41)

Estimated IQ - WAIS - Wechsler Adult Intelligence Scale (Matrix Reasoning and Vocabulary) (42,43).

### Primary outcome (Episodic Memory)

Rey Auditory Verbal Learning Test (RAVLT) - A list of 15 words is presented, and subjects are asked to say all words they can remember. The process is repeated 5 times. Twenty minutes after the 5th trial, an interference list of 15 words (List B) is presented, followed by a free-recall test of that list. Immediately after this, delayed recall of the first list is tested (Trial 6) without further presentation of those words. After a 20-

1  
2  
3 min delay period, subjects are again required to recall words from List A (Trial 7). Finally,  
4  
5 recognition can be tested with the use of a matrix array, in which the individual must  
6  
7 identify List A words from a list of 50 words containing all items from Lists A and B and  
8  
9 20 words that are phonemically or semantically similar to those in Lists A and B. (44)

### 12 13 **Secondary outcome**

14  
15 EEG assessment. The exam is performed on the Nihon Kohden® EEG 1200  
16  
17 version 01.71 digital equipment, with simultaneous video recording with a Sony® Ipela  
18  
19 camera. For qualitative EEG data collection, we use the international 10-20 electrode  
20  
21 placement system, 19 channels (being one to electrocardiogram), with sampling rate of  
22  
23 200Hz, a time of 0.3, high filter from 35 to 70 Hz and sensitivity of 7  $\mu$ V. For the  
24  
25 quantitative analysis, the data are converted using Neuromap from the Neuroworkbench  
26  
27 software. The exam lasts 30 minutes (15 minutes with your eyes open and 15 minutes  
28  
29 with your eyes closed - relaxed wakefulness). The analyses are performed by a certified  
30  
31 neurophysiologist (STS).  
32  
33  
34  
35

### 36 37 **Safety screening**

38  
39 Adverse Events Questionnaire (AEQ): Questionnaire that must be answered after  
40  
41 each stimulation session to assess adverse effects such as tingling sensations, itching, mild  
42  
43 transient redness of the skin and discomfort on the region of stimulation, moderate fatigue,  
44  
45 difficulty concentrating, headache, and nausea. (45)  
46  
47  
48

### 49 50 **Intervention**

#### 51 52 *Transcranial direct current stimulation (tDCS)*

53  
54 Both anodal and sham tDCS will be delivered by the same battery-driven  
55  
56 (neuroConn: DC Stimulator Plus), for 20 minutes. The research assistant will set up the  
57  
58 device according to the assignment list in order of participant's registration number.  
59  
60

1  
2  
3 Saline-soaked surface 35cm<sup>2</sup> (5 cm X 7cm) sponge electrodes connected to the stimulator  
4  
5 will be placed upon the patient's scalp and secured with adjustable rubber straps.  
6  
7

8 The sponge placement follows the 10-20 EEG system. Group 1 - bilateral  
9  
10 temporal cortex (BTC) - two anode electrodes are placed over T3 and T4 respectively,  
11  
12 and the cathode electrode over the supraorbital region (FP2). Group 2 – left dorsolateral  
13  
14 prefrontal cortex (IDL PFC), the anode electrode is placed over F3 and the cathode over  
15  
16 FP2. Group 3 – sham group – half of the participants are following the montage of group  
17  
18 1 (BTC) and the other half from group 2 (IDL PFC). For the sham stimulation, patients  
19  
20 receive the active current with ramping up and down for 30 seconds to simulate the real  
21  
22 stimulation, as referred by other studies. (45,46) Patients are monitored daily for side  
23  
24 effects, according to international safety guidelines, and with the Adverse Events  
25  
26 Questionnaire (AEQ). (47)  
27  
28  
29

### 30 *Cognitive Training*

31  
32  
33 The RehaCom is a cognitive software for patients with different etiologies  
34  
35 approved by the Brazilian Health Regulatory Agency (ANVISA). This software has  
36  
37 several cognitive modules. For the purpose of the present study, we are using the  
38  
39 attentional visual and verbal memory training tasks with increasing levels of difficulty  
40  
41 according to the patient's performance. During the training, the feedback option is active,  
42  
43 so the patient can be oriented and improve his/her performance over the trials. The initial  
44  
45 level is adjusted to level 1 for all patients who have incomplete high school, for those  
46  
47 who complete high school the starting level is 4, and for those with complete college, the  
48  
49 starting level is 5. (48–50)  
50  
51  
52

53 The cognitive training follows two possible random sequence order – memory/  
54  
55 attention or attention/memory modules, always alternating daily up to the end of the last  
56  
57  
58  
59  
60

1  
2  
3 stimulation session. Each training has a 20-minute duration, always concomitant to the  
4  
5 tDCS.  
6  
7

### 8 **Sample size calculation**

9

10 The sample calculation was performed using the software GPower 3.1, using the  
11 statistical 2-way ANOVA (3 groups and 3 timepoints), a given  $\alpha$  5%, power 80% and,  
12  
13 interaction effect of 0.25 considering the primary outcome. G power analysis provided a  
14  
15 sample size of 36 participants based on the F calculation.  
16  
17  
18  
19

### 20 **Statistical analysis**

21

22 Descriptive statistics are used to report demographic data. Kolmogorov-Smirnov  
23  
24 test was used to test data normality. To analyze the primary outcome, changes on episodic  
25  
26 memory (RAVLT scores), we will use ANOVA for normal data distribution or non-  
27  
28 parametric tests. We assume that each participant has a random effect on the model. For  
29  
30 the secondary outcome (EEG spectral power), we plan to use the mixed effect model  
31  
32 (reml), considering group and time as fixed factors and each participant as a random effect.  
33  
34 Estimated alpha value of 5%. An intention-to-treat framework will be applied.  
35  
36  
37  
38  
39  
40

### 41 **Ethics and dissemination**

42

43 TDCS is a safe intervention not only because the electric current applied is very  
44  
45 low (0.5 - 2mA over a 25-35 cm<sup>2</sup> area), but also because the electrodes embedded in saline  
46  
47 solution minimize tissue resistance, avoid overheating. Tingling sensations, itching, mild  
48  
49 transient redness of the skin and discomfort on the region of stimulation, moderate fatigue,  
50  
51 difficulty concentrating, headache and nausea are possible adverse effects, but these  
52  
53 effects do not usually last long and are often seen at the same frequency in experimental  
54  
55 and placebo groups. (10,51,52) The safety side-effect questionnaire (AEQ (31)) is  
56  
57 collected after each stimulation session. Complaints regarding the stimulation or high  
58  
59  
60

1  
2  
3 AEQ scores are reported to the safety board and the medical coverage may be called for  
4 necessary care. Written informed consent for participation in the study will be obtained  
5 from all participants. Participant information is stored securely in locked file cabinets and  
6 participant digital information is password protected.  
7  
8  
9  
10  
11  
12

### 13 **Results**

14  
15 Based on the previous studies in TBI and tDCS, we expect that (1) improvement  
16 on the memory scores in the active tDCS group compared to the sham group; (2) memory  
17 scores will be higher after the BTC active tDCS compared to the IDLPFC; (3) we  
18 hypothesize that measures of the EEG will show significant delta reduction and an  
19 increase in alpha waves close to the of active sponge placement compared to the sham  
20 group.  
21  
22  
23  
24  
25  
26  
27  
28  
29

### 30 **DISCUSSION**

31  
32 In order to contribute to the development of evidence-based rehabilitation  
33 treatments to TBI survivors with memory impairments, the present study aims to  
34 investigate whether the concomitant use of tDCS targeting the BTC or the IDLPFC  
35 concomitant to the computer-based cognitive training improves memory performance in  
36 patients with moderate and severe closed TBI patients.  
37  
38  
39  
40  
41  
42  
43

44 Indeed, TBI causes health loss and disability for individuals and their families (53)  
45 and memory impairment is one of the most frequent cognitive complaints, (54,55) an  
46 effective rehabilitation tool will be helpful to improve this burden in this population.  
47  
48  
49

50  
51 There is evidence that tDCS may improve cognitive impairments, such as memory  
52 impairments, following TBI and other etiologies. (56,57) Prior research has shown the  
53 efficacy of anodal tDCS in improving memory performance during tasks such as face-  
54 name associative recall tasks, intentional memorization of words, figure-naming tests,  
55 word recall and picture-pseudoword associative learning tasks. (58–62) A recent  
56  
57  
58  
59  
60



1  
2  
3 systematic review found 14 experimental studies on adult TBI patients who received  
4 tDCS for the assessment of clinical or surrogate outcomes (63) and, to our knowledge,  
5 just two studies used tDCS concomitant to cognitive training in TBI patients. (20,22)  
6  
7  
8

9  
10 Despite some disadvantages, namely poor spatial/temporal resolution and  
11 stimulation of large part of the brain, there are many advantages to tDCS, such as low  
12 risk of adverse effects and low cost. (64) It has been proven that tDCS does not induce  
13 depolarization, meaning it does not induce the firing of neurons when they are not near  
14 threshold. Therefore it is less likely that neurons not engaged in the task at hand will  
15 discharge, hence the importance of applying tDCS during a specific task in order to target  
16 a particular circuitry. (23) It has also been suggested that more systematic investigations  
17 are needed, due to the heterogeneity of findings in tDCS research and the different  
18 parameters used in the stimulation. (59,65)  
19  
20  
21  
22  
23  
24  
25  
26  
27  
28  
29

30 EEG will be used to guarantee safety (32–35) and to measure cortical activity post  
31 intervention. Spikes and abnormal waves shown on the EEG will provide clinical  
32 guidance on whether to include the participant in the present study. We expect to reduce  
33 delta activities and increase alpha frequencies close to the active electrodes and find a  
34 better performance correlation in neuropsychological tests in the active group, as  
35 demonstrated previously. (24)  
36  
37  
38  
39  
40  
41  
42  
43

44 This is a study to test the effectiveness of combined tDCS and cognitive training  
45 to improve episodic memory in patients with TBI. The results generated may potentially  
46 be useful for other neurological disorders that cause cognitive impairments. Our open-  
47 label pilot study (n=4 participants) has proven the feasibility of the method and a  
48 moderate effect size of the RAVL scores between the baseline to the last tDCS session.  
49 Results will be presented at conferences and submitted for publication in peer-reviewed  
50 journals.  
51  
52  
53  
54  
55  
56  
57  
58  
59  
60

## **Trial Status**

This trial was registered on the website [clinicaltrials.gov](https://clinicaltrials.gov) with the registration number NCT04540783. The open-label pilot study was performed with 4 participants in 2018 and validated the study protocol. Recruitment started in February 2019. At the time of submission of this paper, we had completed 15 participants. The programmed completion date for the primary outcome is June 2022.

This study will provide important data regarding the use of the combined tools to improve the memory of persons that suffer from the sequela of a TBI. Longitudinal clinical studies are required to further interrogate the clinical efficacy of this technique to improve the mood and the quality of life of this target population.

## **Acknowledgements**

The authors thank the Institute of Psychiatry, Hospital das Clínicas (IPq HCFMUSP), the secretary Sandra Aparecida de Lima Falcon and all participants and their families for their support and assistance.

## **Conflicts of Interests**

Authors report no conflict of interests.

## **Data**

Technical appendix, statistical code, and dataset will be available from the following link:

<https://drive.google.com/file/d/1WLV4yowqcyU5DuHW9PBI3FQtNrS2WKWe/view?usp=sharing>

## **Author Contributions**

Research project: Conception – ALZ, WSP.

Organization – ALZ, WSP, ARB, LV, VMG.

Execution – DJF, VMP, DC, STS.

Statistical Analysis: Design – ALZ, WSP, ARB

1  
2  
3 Manuscript Preparation: First draft – DJF. Final draft – DJF, VMP, DC, ALZ

4  
5 Review and Critique: ALZ, ARB, LV, VMG, DC, DJF, VMP.  
6  
7

## 8 9 **Funding**

10  
11 Vanessa M. Paglioni reports grant from Coordination for the Improvement of Higher  
12  
13 Education Personnel (CAPES) – Brazil.

14  
15 Dr. Ana Luiza Zaninotto is supported by the National Institute of Health  
16  
17 3R01DC017291 – 02.  
18

19  
20 Dr. Wellingson Silva Paiva is supported by the NIHR Global Health Research Group on  
21  
22 Neurotrauma, which was commissioned by the National Institute for Health Research  
23  
24 (NIHR) using UK aid from the UK Government (project 16/137/105).  
25

26  
27 The views expressed in this publication are those of the author(s) and not necessarily  
28  
29 those of the NIH, NIDCD, NIHR or the Department of Health and Social Care.  
30  
31

## 32 33 **ORCID IDs**

34  
35 Dagliê Jorge de Freitas <https://orcid.org/0000-0002-2473-6210>

36  
37 Daniel de Carvalho <https://orcid.org/0000-0003-4960-0800>

38  
39 Vanessa M. Paglioni <https://orcid.org/0000-0002-8008-2231>

40  
41 Andre R. Brunoni <https://orcid.org/0000-0002-6310-3571>

42  
43 Leandro Valiengo <https://orcid.org/0000-0002-7628-9993>

44  
45 Sigride Thome-Souza <https://orcid.org/0000-0002-3017-6723>

46  
47 Vinicius Monteiro de Paula Guirado <https://orcid.org/0000-0002-7782-3609>

48  
49 Ana Luiza Zaninotto <https://orcid.org/0000-0003-0639-0612>

50  
51 Wellingson S. Paiva <https://orcid.org/0000-0002-5165-7040>  
52  
53

54  
55 **Legend for Figure 1:** Figure 1 CONSORT Flow Diagram  
56  
57  
58  
59  
60

## REFERENCES

- 1 Menon DK, Schwab K, Wright DW, Maas AI. Position statement: Definition of traumatic brain injury. Vol. 91, *Arch Phys Med Rehabil* 2010;91:1637–40.
- 2 Gentleman SM, Roberts GW, Gennarelli TA, Maxwell WL, Adams JH, Kerr S, et al. Axonal injury: a universal consequence of fatal closed head injury? *Acta Neuropathol* 1995;89:537–43.
- 3 Miotto EC, Cinalli FZ, Serrao VT, Benute GG, Lucia MCS, Scaff M. Cognitive deficits in patients with mild to moderate traumatic brain injury. *Arq. Neuro-Psiquiatr* 2010;68:862–8.
- 4 Wright MJ, Schmitter-Edgecombe M. The impact of verbal memory encoding and consolidation deficits during recovery from moderate-to-severe traumatic brain injury. *J Head Trauma Rehabil* 2011;26:182–91.
- 5 Vakil E, Greenstein Y, Weiss I, Shtein S. The Effects of Moderate-to-Severe Traumatic Brain Injury on Episodic Memory: a Meta-Analysis. *Neuropsychol Rev* 2019;29:270–87.
- 6 Moscovitch M, Cabeza R, Winocur G, Nadel L. Episodic Memory and Beyond: The Hippocampus and Neocortex in Transformation. *Annu Rev Psychol* 2016;67:105–34.
- 7 Eichenbaum H. Prefrontal-hippocampal interactions in episodic memory. *Nat Rev Neurosci* 2017;18:547–58.
- 8 Ponsford JL, Downing MG, Olver J, Ponsford M, Acher R, Carty M, et al. Longitudinal follow-up of patients with traumatic brain injury: Outcome at two, five, and ten years post-injury. *J Neurotrauma* 2014;31:64–77.
- 9 Nitsche MA, Liebetanz D, Lang N, Antal A, Tergau F, Paulus W. Safety criteria for transcranial direct current stimulation (tDCS) in humans. *Clin Neurophysiol* 2003;114:2220–2.
- 10 Nitsche MA, Cohen LG, Wassermann EM, Priori A, Lang N, Antal A, et al. Transcranial direct current stimulation: State of the art 2008. *Brain Stimul* 2008;1:206–23.
- 11 Levin HS. Memory deficit after closed-head injury. *J Clin Exp Neuropsychol* 1990;12:129–53.
- 12 Li S, Zaninotto AL, Neville IS, Paiva WS, Nunn D, Fregni F. Clinical utility of brain stimulation modalities following traumatic brain injury: Current evidence. *Neuropsychiatr Dis Treat* 2015;11:1573–86.
- 13 Amatachaya A, Auvichayapat N, Patjanasontorn N, Suphakunpinyo C, Ngernyam N, Aree-uea B, et al. Effect of Anodal Transcranial Direct Current Stimulation on Autism: A Randomized Double-Blind Crossover Trial. *Behav Neurol* 2014;2014:1–7.
- 14 Palacios EM, Sala-Llloch R, Junque C, Fernandez-Espejo D, Roig T, Tormos JM, et al. Long-term declarative memory deficits in diffuse TBI: Correlations with cortical thickness, white matter integrity and hippocampal volume. *Cortex* 2013;49:646–57.
- 15 Sozda CN, Muir JJ, Springer US, Partovi D, Cole MA. Differential learning and memory performance in OEF/OIF veterans for verbal and visual material. *Neuropsychology* 2014;28:347–52.
- 16 Zaninotto AL, Vicentini JE, Solla DJF, Silva TT, De Paula Guirado VM, Feltrin F, et al. Visuospatial memory improvement in patients with diffuse axonal injury (DAI): A 1-year follow-up study. *Acta Neuropsychiatr* 2017;29:35–42.
- 17 Estraneo A, Pascarella A, Moretta P, Masotta O, Fiorenza S, Chirico G, et al.

- 1  
2  
3 Repeated transcranial direct current stimulation in prolonged disorders of  
4 consciousness: A double-blind cross-over study. *J Neurol Sci* 2017;375:464–70.  
5  
6 18 Wilke S, List J, Mekle R, Lindenberg R, Bukowski M, Ott S, et al. No effect of  
7 anodal tDCS on GABA levels in patients with recurrent mild traumatic brain  
8 injury. *J Neurotrauma* 2016;1–50.  
9  
10 19 Kang EK, Kim DY, Paik NJ. Transcranial direct current stimulation of the left  
11 prefrontal cortex improves attention in patients with traumatic brain injury: A  
12 pilot study. *J Rehabil Med* 2012;44:346–50.  
13  
14 20 Leśniak M, Polanowska K, Seniów J, Członkowska A. Effects of repeated anodal  
15 tDCS coupled with cognitive training for patients with severe traumatic brain  
16 injury: A pilot randomized controlled trial. *J Head Trauma Rehabil* 2014;29:  
17 E20-E29.  
18  
19 21 Galetto V, Sacco K. Neuroplastic Changes Induced by Cognitive Rehabilitation  
20 in Traumatic Brain Injury: A Review. *Neurorehabil Neural Repair* 2017;31:800–  
21 13.  
22  
23 22 Sacco K, Galetto V, Dimitri D, Geda E, Perotti F, Zettin M, et al. Concomitant  
24 use of transcranial direct current stimulation and computer-assisted training for  
25 the rehabilitation of attention in traumatic brain injured patients: Behavioral and  
26 neuroimaging results. *Front Behav Neurosci* 2016;10:1–11.  
27  
28 23 Miniussi C, Harris JA, Ruzzoli M. Modelling non-invasive brain stimulation in  
29 cognitive neuroscience. *Neurosci Biobehav Rev* 2013;37:1702–12.  
30  
31 24 Ulam F, Shelton C, Richards L, Davis L, Hunter B, Fregni F, et al. Cumulative  
32 effects of transcranial direct current stimulation on EEG oscillations and  
33 attention/working memory during subacute neurorehabilitation of traumatic brain  
34 injury. *Clin Neurophysiol* 2015;126:486–96.  
35  
36 25 Keeser D, Padberg F, Reisinger E, Pogarell O, Kirsch V, Palm U, et al. Prefrontal  
37 direct current stimulation modulates resting EEG and event-related potentials in  
38 healthy subjects: A standardized low resolution tomography (sLORETA) study.  
39 *Neuroimage* 2010;55:644–57.  
40  
41 26 Balconi M, Vitaloni S. The tDCS effect on alpha brain oscillation for correct vs.  
42 incorrect object use. The contribution of the left DLPFC. *Neurosci Lett*  
43 2012;517:25–9.  
44  
45 27 Maeoka H, Matsuo A, Hiyamizu M, Morioka S, Ando H. Influence of  
46 transcranial direct current stimulation of the dorsolateral prefrontal cortex on pain  
47 related emotions: A study using electroencephalographic power spectrum  
48 analysis. *Neurosci Lett* 2012;512:12–6.  
49  
50 28 Jacobson L, Ezra A, Berger U, Lavidor M. Modulating oscillatory brain activity  
51 correlates of behavioral inhibition using transcranial direct current stimulation.  
52 *Clin Neurophysiol* 2012;123:979–84.  
53  
54 29 Miller J, Berger B, Sauseng P. Anodal transcranial direct current stimulation  
55 (tDCS) increases frontal-midline theta activity in the human EEG: A preliminary  
56 investigation of non-invasive stimulation. *Neurosci Lett* 2015;588:114–9.  
57  
58 30 St. Louis EK, Frey LC, eds. *Electroencephalography (EEG): An Introductory  
59 Text and Atlas of Normal and Abnormal Findings in Adults, Children, and  
60 Infants*. Chicago, IL: American Epilepsy Society 2016.  
31  
32 31 Hughes JR. *EEG in clinical practice*. Newton, MA: Butterworth-Heinemann  
1994:242  
33  
34 32 Liu A, Bryant A, Jefferson A, Friedman D, Minhas P, Barnard S, et al. Exploring  
35 the efficacy of a 5-day course of transcranial direct current stimulation (TDCS)  
36 on depression and memory function in patients with well-controlled temporal

- lobe epilepsy. *Epilepsy Behav* 2016;55:11–20.
- 33 Antal A, Boros K, Poreisz C, Chaieb L, Terney D, Paulus W. Comparatively weak after-effects of transcranial alternating current stimulation (tACS) on cortical excitability in humans. *Brain Stimul* 2008;1:97–105.
- 34 Zaehle T, Sandmann P, Thorne JD, Jäncke L, Herrmann CS. Transcranial direct current stimulation of the prefrontal cortex modulates working memory performance: Combined behavioural and electrophysiological evidence. *BMC Neurosci* 2011;12:9–14.
- 35 Tadini L, El-Nazer R, Brunoni AR, Williams J, Carvas M, Boggio P, et al. Cognitive, mood, and electroencephalographic effects of noninvasive cortical stimulation with weak electrical currents. *J ECT* 2011;27:134–40.
- 36 Hannawi Y, Stevens RD. Mapping the connectome following traumatic brain injury. *Curr Neurol Neurosci Rep* 2016;16(5).
- 37 Marceglia S, Mrakic-Sposta S, Rosa M, Ferrucci R, Mameli F, Vergari M, et al. Transcranial direct current stimulation modulates cortical neuronal activity in Alzheimer's disease. *Front Neurosci* 2016;10:1–11.
- 38 Roche RAP, Dockree PM, Garavan H, Foxe JJ, Robertson IH, O'Mara SM. EEG alpha power changes reflect response inhibition deficits after traumatic brain injury (TBI) in humans. *Neurosci Lett* 2004;362:1–5.
- 39 Dressler O, Schneider G, Stockmanns G, Kochs EF. Awareness and the EEG power spectrum: Analysis of frequencies. *Br J Anaesth* 2004;93:806–9.
- 40 Gorenstein C, Wang YP, Argimon I de L, Werlang BSG. Manual do Inventário de depressão de Beck-BDI-II. São Paulo, SP: Casa do Psicólogo 2011:172
- 41 Cunha JA. Manual da versão em português das Escalas Beck. São Paulo, SP: Casa do Psicólogo 2001:171
- 42 Denney DA, Ringe WK, Lacritz LH. Dyadic short forms of the Wechsler Adult Intelligence Scale-IV. *Arch Clin Neuropsychol* 2015;30:404–12.
- 43 Wechsler D. WAIS-III: Escala de inteligência Wechsler para adultos: manual técnico. São Paulo, SP: Casa do Psicólogo 2004:276
- 44 De Paula J, Fernandes Malloy-Diniz L. Teste de Aprendizagem Auditivo-Verbal de Rey (RAVLT). São Paulo: Vetor Editora Psico-Pedagógica Ltda. 2018.
- 45 Bikson M, Grossman P, Thomas C, Zannou AL, Jiang J, Adnan T, et al. Safety of Transcranial Direct Current Stimulation: Evidence Based Update 2016. *Brain Stimul* 2016;9:641–61.
- 46 Antal A, Alekseichuk I, Bikson M, Brockmöller J, Brunoni AR, Chen R, et al. Low intensity transcranial electric stimulation: Safety, ethical, legal regulatory and application guidelines. *Clin Neurophysiol* 2017;128:1774–809.
- 47 Brunoni AR, Amadera J, Berbel B, Volz MS, Rizzerio BG, Fregni F. A systematic review on reporting and assessment of adverse effects associated with transcranial direct current stimulation. *Int J Neuropsychopharmacol* 2011;14:1133–45.
- 48 Fernandez E, Bergado Rosado JA, Perez DR, Santana SS, Aguilar MT, Bringas ML. Effectiveness of a computer-based training program of attention and memory in patients with acquired brain damage. *Behav Sci* 2018;8.
- 49 Yoo C, Yong MH, Chung J, Yang Y. Effect of computerized cognitive rehabilitation program on cognitive function and activities of living in stroke patients. *J Phys Ther Sci* 2015;27:2487–9.
- 50 Veisi-Pirkoohi S, Hassani-Abharian P, Kazemi R, Vaseghi S, Zarrindast MR, Nasehi M. Efficacy of RehaCom cognitive rehabilitation software in activities of daily living, attention and response control in chronic stroke patients. *J Clin*



- 1  
2  
3  
4  
5  
6  
7  
8  
9  
10  
11  
12  
13  
14  
15  
16  
17  
18  
19  
20  
21  
22  
23  
24  
25  
26  
27  
28  
29  
30  
31  
32  
33  
34  
35  
36  
37  
38  
39  
40  
41  
42  
43  
44  
45  
46  
47  
48  
49  
50  
51  
52  
53  
54  
55  
56  
57  
58  
59  
60
- Neurosci* 2020;71:101–7.
- 51 Brunoni A, Nitsche M, Bolognini N, Bikson M, Wagner T, Merabet L, et al. Clinical research with tDCS: Challenges and future directions. *Brain Stimul* 2012;5:175–95.
- 52 de Amorim RLO, Brunoni AR, de Oliveira MAF, Zaninotto ALC, Nagumo MM, Guirado VM de P, et al. Transcranial direct current stimulation for post-concussion syndrome: Study protocol for a randomized crossover trial. *Front Neurol* 2017 May 2;8:164.
- 53 James SL, Theadom A, Ellenbogen RG, Bannick MS, Montjoy-Venning W, Lucchesi LR, et al. Global, regional, and national burden of traumatic brain injury and spinal cord injury, 1990–2016: a systematic analysis for the Global Burden of Disease Study 2016. *Lancet Neurol* 2019 Jan 1 [cited 2020 Jun 26];18:56–87.
- 54 Jourdan C, Bayen E, Pradat-Diehl P, Ghout I, Darnoux E, Azerad S, et al. A comprehensive picture of 4-year outcome of severe brain injuries. Results from the Paris-TBI study. *Ann Phys Rehabil Med* 2016;59:100–6.
- 55 Zec RF, Zellers D, Belman J, Miller J, Matthews J, Ferneau-Belman D, et al. Long-term consequences of severe closed head injury on episodic memory. *J Clin Exp Neuropsychol* 2001;23:671–91.
- 56 Sandrini M, Brambilla M, Manenti R, Rosini S, Cohen LG, Cotelli M. Noninvasive stimulation of prefrontal cortex strengthens existing episodic memories and reduces forgetting in the elderly. *Front Aging Neurosci* 2014;6:1–9.
- 57 Park SH, Koh EJ, Choi HY, Ko MH. A double-blind, sham-controlled, pilot study to assess the effects of the concomitant use of transcranial direct current stimulation with the computer assisted cognitive rehabilitation to the prefrontal cortex on cognitive functions in patients with stroke. *J Korean Neurosurg Soc* 2013;54(6):484–8.
- 58 Leshikar ED, Leach RC, McCurdy MP, Trumbo MC, Sklenar AM, Frankenstein AN, et al. Transcranial direct current stimulation of dorsolateral prefrontal cortex during encoding improves recall but not recognition memory. *Neuropsychologia* 2017;106:390–7.
- 59 Medvedeva A, Materassi M, Neacsu V, Beresford-Webb J, Hussin A, Khan N, et al. Effects of Anodal Transcranial Direct Current Stimulation Over the Ventrolateral Prefrontal Cortex on Episodic Memory Formation and Retrieval. *Cereb Cortex* 2019;29:657–65.
- 60 Fileccia E, Di Stasi V, Poda R, Rizzo G, Stanzani-Maserati M, Oppi F, et al. Effects on cognition of 20-day anodal transcranial direct current stimulation over the left dorsolateral prefrontal cortex in patients affected by mild cognitive impairment: a case-control study. *Neurol Sci* 2019;40:1865–72.
- 61 Sandrini M, Manenti R, Gobbi E, Rusich D, Bartl G, Cotelli M. Transcranial direct current stimulation applied after encoding facilitates episodic memory consolidation in older adults. *Neurobiol Learn Mem* 2019;163:107037.
- 62 Antonenko D, Thams F, Uhrich J, Dix A, Thurm F, Li SC, et al. Effects of a multi-session cognitive training combined with brain stimulation (TRAINSTIM-COG) on age-associated cognitive decline – Study protocol for a randomized controlled phase IIb (MONOCENTER) trial. *Front Aging Neurosci* 2019;10:1–12.
- 63 Zaninotto AL, El-Hagrassy MM, Green JR, Babo M, Paglioni VM, Guerra Benute G, et al. Transcranial direct current stimulation (tDCS) effects on

- 1  
2  
3 traumatic brain injury (TBI) recovery A systematic review. *Dement*  
4 *Neuropsychol* 2019 [cited 2019 Jul 2];13:172–9.  
5 64 Miniussi C, Ruzzoli M. Transcranial stimulation and cognition. In: Lozano AM,  
6 Hallett M, eds. *Handbook of Clinical Neurology* Elsevier B.V. 2013: 739–50.  
7 65 Galli G, Vadillo MA, Sirota M, Feurra M, Medvedeva A. A systematic review  
8 and meta-analysis of the effects of transcranial direct current stimulation (tDCS)  
9 on episodic memory. *Brain Stimul* 2019;12:231–41.  
10  
11  
12  
13  
14  
15  
16  
17  
18  
19  
20  
21  
22  
23  
24  
25  
26  
27  
28  
29  
30  
31  
32  
33  
34  
35  
36  
37  
38  
39  
40  
41  
42  
43  
44  
45  
46  
47  
48  
49  
50  
51  
52  
53  
54  
55  
56  
57  
58  
59  
60

For peer review only



1  
2  
3  
4  
5  
6  
7  
8  
9  
10  
11  
12  
13  
14  
15  
16  
17  
18  
19  
20  
21  
22  
23  
24  
25  
26  
27  
28  
29  
30  
31  
32  
33  
34  
35  
36  
37  
38  
39  
40  
41  
42  
43  
44  
45  
46  
47  
48  
49  
50  
51  
52  
53  
54  
55  
56  
57  
58  
59  
60

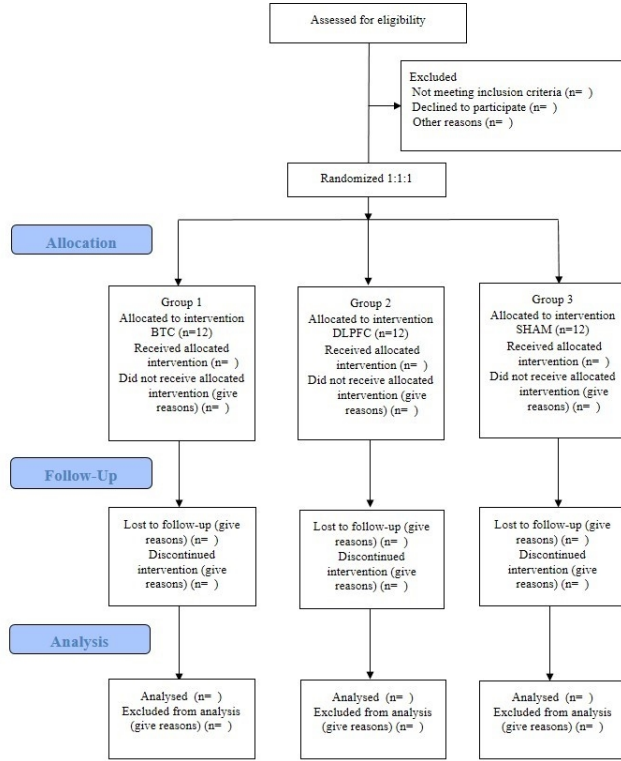

Figure 1 CONSORT Flow Diagram

190x338mm (96 x 96 DPI)

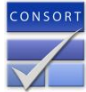

## CONSORT 2010 checklist of information to include when reporting a randomised trial\*

| Section/Topic                    | Item No | Checklist item: The effects of transcranial direct current stimulation (tDCS) and cognitive training on episodic memory in patients with traumatic brain injury: a double-blind, randomized, placebo-controlled study | Reported on page No |
|----------------------------------|---------|-----------------------------------------------------------------------------------------------------------------------------------------------------------------------------------------------------------------------|---------------------|
| <b>Title and abstract</b>        |         |                                                                                                                                                                                                                       |                     |
|                                  | 1a      | Identification as a randomised trial in the title                                                                                                                                                                     | 1                   |
|                                  | 1b      | Structured summary of trial design, methods, results, and conclusions (for specific guidance see CONSORT for abstracts)                                                                                               | 2                   |
| <b>Introduction</b>              |         |                                                                                                                                                                                                                       |                     |
| Background and objectives        | 2a      | Scientific background and explanation of rationale                                                                                                                                                                    | 4-6                 |
|                                  | 2b      | Specific objectives or hypotheses                                                                                                                                                                                     | 6                   |
| <b>Methods</b>                   |         |                                                                                                                                                                                                                       |                     |
| Trial design                     | 3a      | Description of trial design (such as parallel, factorial) including allocation ratio                                                                                                                                  | 6                   |
|                                  | 3b      | Important changes to methods after trial commencement (such as eligibility criteria), with reasons                                                                                                                    | n/a                 |
| Participants                     | 4a      | Eligibility criteria for participants                                                                                                                                                                                 | 8                   |
|                                  | 4b      | Settings and locations where the data were collected                                                                                                                                                                  | 6                   |
| Interventions                    | 5       | The interventions for each group with sufficient details to allow replication, including how and when they were actually administered                                                                                 | 10-11               |
| Outcomes                         | 6a      | Completely defined pre-specified primary and secondary outcome measures, including how and when they were assessed                                                                                                    | 9-10                |
|                                  | 6b      | Any changes to trial outcomes after the trial commenced, with reasons                                                                                                                                                 | n/a                 |
| Sample size                      | 7a      | How sample size was determined                                                                                                                                                                                        | 11-12               |
|                                  | 7b      | When applicable, explanation of any interim analyses and stopping guidelines                                                                                                                                          | n/a                 |
| <b>Randomisation:</b>            |         |                                                                                                                                                                                                                       |                     |
| Sequence generation              | 8a      | Method used to generate the random allocation sequence                                                                                                                                                                | 7                   |
|                                  | 8b      | Type of randomisation; details of any restriction (such as blocking and block size)                                                                                                                                   | 7                   |
| Allocation concealment mechanism | 9       | Mechanism used to implement the random allocation sequence (such as sequentially numbered containers), describing any steps taken to conceal the sequence until interventions were assigned                           | 7                   |
| Implementation                   | 10      | Who generated the random allocation sequence, who enrolled participants, and who assigned participants to interventions                                                                                               | 7                   |

|    |                          |     |                                                                                                                                          |     |
|----|--------------------------|-----|------------------------------------------------------------------------------------------------------------------------------------------|-----|
| 1  | Blinding                 | 11a | If done, who was blinded after assignment to interventions (for example, participants, care providers, those assessing outcomes) and how | 7   |
| 2  |                          |     |                                                                                                                                          |     |
| 3  |                          | 11b | If relevant, description of the similarity of interventions                                                                              | 7   |
| 4  | Statistical methods      | 12a | Statistical methods used to compare groups for primary and secondary outcomes                                                            | 12  |
| 5  |                          | 12b | Methods for additional analyses, such as subgroup analyses and adjusted analyses                                                         | n/a |
| 6  |                          |     |                                                                                                                                          |     |
| 7  | <b>Results</b>           |     |                                                                                                                                          |     |
| 8  | Participant flow (a      | 13a | For each group, the numbers of participants who were randomly assigned, received intended treatment, and                                 | n/a |
| 9  | diagram is strongly      |     | were analysed for the primary outcome                                                                                                    |     |
| 10 | recommended)             | 13b | For each group, losses and exclusions after randomisation, together with reasons                                                         | n/a |
| 11 | Recruitment              | 14a | Dates defining the periods of recruitment and follow-up                                                                                  | n/a |
| 12 |                          | 14b | Why the trial ended or was stopped                                                                                                       | n/a |
| 13 | Baseline data            | 15  | A table showing baseline demographic and clinical characteristics for each group                                                         | n/a |
| 14 | Numbers analysed         | 16  | For each group, number of participants (denominator) included in each analysis and whether the analysis was                              | n/a |
| 15 |                          |     | by original assigned groups                                                                                                              |     |
| 16 | Outcomes and             | 17a | For each primary and secondary outcome, results for each group, and the estimated effect size and its                                    | n/a |
| 17 | estimation               |     | precision (such as 95% confidence interval)                                                                                              |     |
| 18 |                          | 17b | For binary outcomes, presentation of both absolute and relative effect sizes is recommended                                              | n/a |
| 19 | Ancillary analyses       | 18  | Results of any other analyses performed, including subgroup analyses and adjusted analyses, distinguishing                               | n/a |
| 20 |                          |     | pre-specified from exploratory                                                                                                           |     |
| 21 | Harms                    | 19  | All important harms or unintended effects in each group (for specific guidance see CONSORT for harms)                                    | n/a |
| 22 |                          |     |                                                                                                                                          |     |
| 23 | <b>Discussion</b>        |     |                                                                                                                                          |     |
| 24 | Limitations              | 20  | Trial limitations, addressing sources of potential bias, imprecision, and, if relevant, multiplicity of analyses                         | 14  |
| 25 | Generalisability         | 21  | Generalisability (external validity, applicability) of the trial findings                                                                | 14  |
| 26 | Interpretation           | 22  | Interpretation consistent with results, balancing benefits and harms, and considering other relevant evidence                            | n/a |
| 27 |                          |     |                                                                                                                                          |     |
| 28 | <b>Other information</b> |     |                                                                                                                                          |     |
| 29 | Registration             | 23  | Registration number and name of trial registry                                                                                           | 15  |
| 30 | Protocol                 | 24  | Where the full trial protocol can be accessed, if available                                                                              | 15  |
| 31 | Funding                  | 25  | Sources of funding and other support (such as supply of drugs), role of funders                                                          | 16  |

38 \*We strongly recommend reading this statement in conjunction with the CONSORT 2010 Explanation and Elaboration for important clarifications on all the items. If relevant, we also  
 39 recommend reading CONSORT extensions for cluster randomised trials, non-inferiority and equivalence trials, non-pharmacological treatments, herbal interventions, and pragmatic trials.  
 40 Additional extensions are forthcoming: for those and for up to date references relevant to this checklist, see [www.consort-statement.org](http://www.consort-statement.org).  
 41  
 42

# Reporting checklist for protocol of a clinical trial.

Based on the SPIRIT guidelines.

## Instructions to authors

Complete this checklist by entering the page numbers from your manuscript where readers will find each of the items listed below.

Your article may not currently address all the items on the checklist. Please modify your text to include the missing information. If you are certain that an item does not apply, please write "n/a" and provide a short explanation.

Upload your completed checklist as an extra file when you submit to a journal.

In your methods section, say that you used the SPIRIT reporting guidelines, and cite them as:

Chan A-W, Tetzlaff JM, Altman DG, Laupacis A, Gøtzsche PC, Krleža-Jerić K, Hróbjartsson A, Mann H, Dickersin K, Berlin J, Doré C, Parulekar W, Summerskill W, Groves T, Schulz K, Sox H, Rockhold FW, Rennie D, Moher D. SPIRIT 2013 Statement: Defining standard protocol items for clinical trials. *Ann Intern Med.* 2013;158(3):200-207

|                                   |                                                                                                                                 | Page   |
|-----------------------------------|---------------------------------------------------------------------------------------------------------------------------------|--------|
|                                   | Reporting Item                                                                                                                  | Number |
| <b>Administrative information</b> |                                                                                                                                 |        |
| Title                             | <a href="#">#1</a> Descriptive title identifying the study design, population, interventions, and, if applicable, trial acronym | 1      |

|    |                          |                     |                                                              |     |
|----|--------------------------|---------------------|--------------------------------------------------------------|-----|
| 1  | Trial registration       | <a href="#">#2a</a> | Trial identifier and registry name. If not yet registered,   | 2   |
| 2  |                          |                     |                                                              |     |
| 3  |                          |                     | name of intended registry                                    |     |
| 4  |                          |                     |                                                              |     |
| 5  |                          |                     |                                                              |     |
| 6  | Trial registration: data | <a href="#">#2b</a> | All items from the World Health Organization Trial           | 14  |
| 7  |                          |                     |                                                              |     |
| 8  | set                      |                     | Registration Data Set                                        |     |
| 9  |                          |                     |                                                              |     |
| 10 |                          |                     |                                                              |     |
| 11 | Protocol version         | <a href="#">#3</a>  | Date and version identifier                                  | n/a |
| 12 |                          |                     |                                                              |     |
| 13 |                          |                     |                                                              |     |
| 14 |                          |                     |                                                              |     |
| 15 | Funding                  | <a href="#">#4</a>  | Sources and types of financial, material, and other support  | 15  |
| 16 |                          |                     |                                                              |     |
| 17 |                          |                     |                                                              |     |
| 18 | Roles and                | <a href="#">#5a</a> | Names, affiliations, and roles of protocol contributors      | 15  |
| 19 |                          |                     |                                                              |     |
| 20 | responsibilities:        |                     |                                                              |     |
| 21 |                          |                     |                                                              |     |
| 22 | contributorship          |                     |                                                              |     |
| 23 |                          |                     |                                                              |     |
| 24 |                          |                     |                                                              |     |
| 25 |                          |                     |                                                              |     |
| 26 | Roles and                | <a href="#">#5b</a> | Name and contact information for the trial sponsor           | n/a |
| 27 |                          |                     |                                                              |     |
| 28 | responsibilities:        |                     |                                                              |     |
| 29 |                          |                     |                                                              |     |
| 30 | sponsor contact          |                     |                                                              |     |
| 31 |                          |                     |                                                              |     |
| 32 | information              |                     |                                                              |     |
| 33 |                          |                     |                                                              |     |
| 34 |                          |                     |                                                              |     |
| 35 |                          |                     |                                                              |     |
| 36 | Roles and                | <a href="#">#5c</a> | Role of study sponsor and funders, if any, in study design;  | 15  |
| 37 |                          |                     |                                                              |     |
| 38 | responsibilities:        |                     | collection, management, analysis, and interpretation of      |     |
| 39 |                          |                     |                                                              |     |
| 40 | sponsor and funder       |                     | data; writing of the report; and the decision to submit the  |     |
| 41 |                          |                     |                                                              |     |
| 42 |                          |                     | report for publication, including whether they will have     |     |
| 43 |                          |                     |                                                              |     |
| 44 |                          |                     | ultimate authority over any of these activities              |     |
| 45 |                          |                     |                                                              |     |
| 46 |                          |                     |                                                              |     |
| 47 |                          |                     |                                                              |     |
| 48 | Roles and                | <a href="#">#5d</a> | Composition, roles, and responsibilities of the coordinating | 7   |
| 49 |                          |                     |                                                              |     |
| 50 | responsibilities:        |                     | centre, steering committee, endpoint adjudication            |     |
| 51 |                          |                     |                                                              |     |
| 52 | committees               |                     | committee, data management team, and other individuals       |     |
| 53 |                          |                     |                                                              |     |
| 54 |                          |                     | or groups overseeing the trial, if applicable (see Item 21a  |     |
| 55 |                          |                     |                                                              |     |
| 56 |                          |                     | for data monitoring committee)                               |     |
| 57 |                          |                     |                                                              |     |
| 58 |                          |                     |                                                              |     |
| 59 |                          |                     |                                                              |     |
| 60 |                          |                     |                                                              |     |

1 **Introduction**  
2  
3

4 Background and [#6a](#) Description of research question and justification for 4-6  
5  
6 rationale undertaking the trial, including summary of relevant studies  
7  
8 (published and unpublished) examining benefits and harms  
9  
10 for each intervention  
11  
12

13  
14 Background and [#6b](#) Explanation for choice of comparators 4-6  
15  
16 rationale: choice of  
17  
18 comparators  
19  
20

21 Objectives [#7](#) Specific objectives or hypotheses 6  
22  
23

24 Trial design [#8](#) Description of trial design including type of trial (eg, parallel 6  
25  
26 group, crossover, factorial, single group), allocation ratio,  
27  
28 and framework (eg, superiority, equivalence, non-inferiority,  
29  
30 exploratory)  
31  
32  
33

34 **Methods:**  
35

36 **Participants,**  
37  
38 **interventions, and**  
39  
40 **outcomes**  
41  
42  
43

44 Study setting [#9](#) Description of study settings (eg, community clinic, 7  
45  
46 academic hospital) and list of countries where data will be  
47  
48 collected. Reference to where list of study sites can be  
49  
50 obtained  
51  
52  
53

54 Eligibility criteria [#10](#) Inclusion and exclusion criteria for participants. If 7-8  
55  
56 applicable, eligibility criteria for study centres and  
57  
58  
59

|    |                      |                                                                                   |       |
|----|----------------------|-----------------------------------------------------------------------------------|-------|
| 1  |                      | individuals who will perform the interventions (eg,                               |       |
| 2  |                      |                                                                                   |       |
| 3  |                      | surgeons, psychotherapists)                                                       |       |
| 4  |                      |                                                                                   |       |
| 5  |                      |                                                                                   |       |
| 6  | Interventions:       | <a href="#">#11a</a> Interventions for each group with sufficient detail to allow | 10-11 |
| 7  |                      |                                                                                   |       |
| 8  | description          | replication, including how and when they will be                                  |       |
| 9  |                      |                                                                                   |       |
| 10 |                      | administered                                                                      |       |
| 11 |                      |                                                                                   |       |
| 12 |                      |                                                                                   |       |
| 13 | Interventions:       | <a href="#">#11b</a> Criteria for discontinuing or modifying allocated            | n/a   |
| 14 |                      |                                                                                   |       |
| 15 | modifications        | interventions for a given trial participant (eg, drug dose                        |       |
| 16 |                      |                                                                                   |       |
| 17 |                      | change in response to harms, participant request, or                              |       |
| 18 |                      |                                                                                   |       |
| 19 |                      | improving / worsening disease)                                                    |       |
| 20 |                      |                                                                                   |       |
| 21 |                      |                                                                                   |       |
| 22 |                      |                                                                                   |       |
| 23 | Interventions:       | <a href="#">#11c</a> Strategies to improve adherence to intervention protocols,   | n/a   |
| 24 |                      |                                                                                   |       |
| 25 | adherence            | and any procedures for monitoring adherence (eg, drug                             |       |
| 26 |                      |                                                                                   |       |
| 27 |                      | tablet return; laboratory tests)                                                  |       |
| 28 |                      |                                                                                   |       |
| 29 |                      |                                                                                   |       |
| 30 |                      |                                                                                   |       |
| 31 | Interventions:       | <a href="#">#11d</a> Relevant concomitant care and interventions that are         | n/a   |
| 32 |                      |                                                                                   |       |
| 33 | concomitant care     | permitted or prohibited during the trial                                          |       |
| 34 |                      |                                                                                   |       |
| 35 |                      |                                                                                   |       |
| 36 | Outcomes             | <a href="#">#12</a> Primary, secondary, and other outcomes, including the         | 9     |
| 37 |                      |                                                                                   |       |
| 38 |                      | specific measurement variable (eg, systolic blood                                 |       |
| 39 |                      |                                                                                   |       |
| 40 |                      | pressure), analysis metric (eg, change from baseline, final                       |       |
| 41 |                      |                                                                                   |       |
| 42 |                      | value, time to event), method of aggregation (eg, median,                         |       |
| 43 |                      |                                                                                   |       |
| 44 |                      | proportion), and time point for each outcome. Explanation                         |       |
| 45 |                      |                                                                                   |       |
| 46 |                      | of the clinical relevance of chosen efficacy and harm                             |       |
| 47 |                      |                                                                                   |       |
| 48 |                      | outcomes is strongly recommended                                                  |       |
| 49 |                      |                                                                                   |       |
| 50 |                      |                                                                                   |       |
| 51 |                      |                                                                                   |       |
| 52 |                      |                                                                                   |       |
| 53 | Participant timeline | <a href="#">#13</a> Time schedule of enrolment, interventions (including any      | 8     |
| 54 |                      |                                                                                   |       |
| 55 |                      | run-ins and washouts), assessments, and visits for                                |       |
| 56 |                      |                                                                                   |       |
| 57 |                      | participants. A schematic diagram is highly recommended                           |       |
| 58 |                      |                                                                                   |       |
| 59 |                      |                                                                                   |       |
| 60 |                      |                                                                                   |       |

(see Figure)

|    |                              |                      |                                                              |
|----|------------------------------|----------------------|--------------------------------------------------------------|
| 1  |                              |                      |                                                              |
| 2  |                              |                      |                                                              |
| 3  |                              |                      |                                                              |
| 4  | Sample size                  | <a href="#">#14</a>  | Estimated number of participants needed to achieve study 11  |
| 5  |                              |                      |                                                              |
| 6  |                              |                      | objectives and how it was determined, including clinical and |
| 7  |                              |                      |                                                              |
| 8  |                              |                      | statistical assumptions supporting any sample size           |
| 9  |                              |                      |                                                              |
| 10 |                              |                      | calculations                                                 |
| 11 |                              |                      |                                                              |
| 12 |                              |                      |                                                              |
| 13 | Recruitment                  | <a href="#">#15</a>  | Strategies for achieving adequate participant enrolment to 7 |
| 14 |                              |                      |                                                              |
| 15 |                              |                      |                                                              |
| 16 |                              |                      | reach target sample size                                     |
| 17 |                              |                      |                                                              |
| 18 |                              |                      |                                                              |
| 19 | <b>Methods: Assignment</b>   |                      |                                                              |
| 20 |                              |                      |                                                              |
| 21 | <b>of interventions (for</b> |                      |                                                              |
| 22 |                              |                      |                                                              |
| 23 | <b>controlled trials)</b>    |                      |                                                              |
| 24 |                              |                      |                                                              |
| 25 |                              |                      |                                                              |
| 26 | Allocation: sequence         | <a href="#">#16a</a> | Method of generating the allocation sequence (eg, 7          |
| 27 |                              |                      |                                                              |
| 28 | generation                   |                      | computer-generated random numbers), and list of any          |
| 29 |                              |                      |                                                              |
| 30 |                              |                      | factors for stratification. To reduce predictability of a    |
| 31 |                              |                      |                                                              |
| 32 |                              |                      | random sequence, details of any planned restriction (eg,     |
| 33 |                              |                      |                                                              |
| 34 |                              |                      | blocking) should be provided in a separate document that is  |
| 35 |                              |                      |                                                              |
| 36 |                              |                      | unavailable to those who enrol participants or assign        |
| 37 |                              |                      |                                                              |
| 38 |                              |                      | interventions                                                |
| 39 |                              |                      |                                                              |
| 40 |                              |                      |                                                              |
| 41 |                              |                      |                                                              |
| 42 |                              |                      |                                                              |
| 43 | Allocation                   | <a href="#">#16b</a> | Mechanism of implementing the allocation sequence (eg, 7     |
| 44 |                              |                      |                                                              |
| 45 | concealment                  |                      | central telephone; sequentially numbered, opaque, sealed     |
| 46 |                              |                      |                                                              |
| 47 | mechanism                    |                      | envelopes), describing any steps to conceal the sequence     |
| 48 |                              |                      |                                                              |
| 49 |                              |                      | until interventions are assigned                             |
| 50 |                              |                      |                                                              |
| 51 |                              |                      |                                                              |
| 52 |                              |                      |                                                              |
| 53 | Allocation:                  | <a href="#">#16c</a> | Who will generate the allocation sequence, who will enrol 7  |
| 54 |                              |                      |                                                              |
| 55 | implementation               |                      | participants, and who will assign participants to            |
| 56 |                              |                      |                                                              |
| 57 |                              |                      | interventions                                                |
| 58 |                              |                      |                                                              |
| 59 |                              |                      |                                                              |
| 60 |                              |                      |                                                              |



|    |                        |                      |                                                                |     |
|----|------------------------|----------------------|----------------------------------------------------------------|-----|
| 1  | Blinding (masking)     | <a href="#">#17a</a> | Who will be blinded after assignment to interventions (eg,     | 7   |
| 2  |                        |                      | trial participants, care providers, outcome assessors, data    |     |
| 3  |                        |                      | analysts), and how                                             |     |
| 4  |                        |                      |                                                                |     |
| 5  |                        |                      |                                                                |     |
| 6  |                        |                      |                                                                |     |
| 7  |                        |                      |                                                                |     |
| 8  | Blinding (masking):    | <a href="#">#17b</a> | If blinded, circumstances under which unblinding is            | 7   |
| 9  | emergency              |                      | permissible, and procedure for revealing a participant's       |     |
| 10 |                        |                      | allocated intervention during the trial                        |     |
| 11 | unblinding             |                      |                                                                |     |
| 12 |                        |                      |                                                                |     |
| 13 |                        |                      |                                                                |     |
| 14 |                        |                      |                                                                |     |
| 15 |                        |                      |                                                                |     |
| 16 | <b>Methods: Data</b>   |                      |                                                                |     |
| 17 | <b>collection,</b>     |                      |                                                                |     |
| 18 | <b>management, and</b> |                      |                                                                |     |
| 19 | <b>analysis</b>        |                      |                                                                |     |
| 20 |                        |                      |                                                                |     |
| 21 |                        |                      |                                                                |     |
| 22 |                        |                      |                                                                |     |
| 23 |                        |                      |                                                                |     |
| 24 |                        |                      |                                                                |     |
| 25 |                        |                      |                                                                |     |
| 26 | Data collection plan   | <a href="#">#18a</a> | Plans for assessment and collection of outcome, baseline,      | 9   |
| 27 |                        |                      | and other trial data, including any related processes to       |     |
| 28 |                        |                      | promote data quality (eg, duplicate measurements, training     |     |
| 29 |                        |                      | of assessors) and a description of study instruments (eg,      |     |
| 30 |                        |                      | questionnaires, laboratory tests) along with their reliability |     |
| 31 |                        |                      | and validity, if known. Reference to where data collection     |     |
| 32 |                        |                      | forms can be found, if not in the protocol                     |     |
| 33 |                        |                      |                                                                |     |
| 34 |                        |                      |                                                                |     |
| 35 |                        |                      |                                                                |     |
| 36 |                        |                      |                                                                |     |
| 37 |                        |                      |                                                                |     |
| 38 |                        |                      |                                                                |     |
| 39 |                        |                      |                                                                |     |
| 40 |                        |                      |                                                                |     |
| 41 |                        |                      |                                                                |     |
| 42 |                        |                      |                                                                |     |
| 43 | Data collection plan:  | <a href="#">#18b</a> | Plans to promote participant retention and complete follow-    | n/a |
| 44 | retention              |                      | up, including list of any outcome data to be collected for     |     |
| 45 |                        |                      | participants who discontinue or deviate from intervention      |     |
| 46 |                        |                      | protocols                                                      |     |
| 47 |                        |                      |                                                                |     |
| 48 |                        |                      |                                                                |     |
| 49 |                        |                      |                                                                |     |
| 50 |                        |                      |                                                                |     |
| 51 |                        |                      |                                                                |     |
| 52 |                        |                      |                                                                |     |
| 53 | Data management        | <a href="#">#19</a>  | Plans for data entry, coding, security, and storage,           | 12  |
| 54 |                        |                      | including any related processes to promote data quality        |     |
| 55 |                        |                      | (eg, double data entry; range checks for data values).         |     |
| 56 |                        |                      |                                                                |     |
| 57 |                        |                      |                                                                |     |
| 58 |                        |                      |                                                                |     |
| 59 |                        |                      |                                                                |     |
| 60 |                        |                      |                                                                |     |

|    |                            |                                                                                  |     |
|----|----------------------------|----------------------------------------------------------------------------------|-----|
| 1  |                            | Reference to where details of data management                                    |     |
| 2  |                            |                                                                                  |     |
| 3  |                            | procedures can be found, if not in the protocol                                  |     |
| 4  |                            |                                                                                  |     |
| 5  |                            |                                                                                  |     |
| 6  | Statistics: outcomes       | <a href="#">#20a</a> Statistical methods for analysing primary and secondary     | 11  |
| 7  |                            |                                                                                  |     |
| 8  |                            | outcomes. Reference to where other details of the                                |     |
| 9  |                            |                                                                                  |     |
| 10 |                            | statistical analysis plan can be found, if not in the protocol                   |     |
| 11 |                            |                                                                                  |     |
| 12 |                            |                                                                                  |     |
| 13 | Statistics: additional     | <a href="#">#20b</a> Methods for any additional analyses (eg, subgroup and       | 11  |
| 14 |                            |                                                                                  |     |
| 15 | analyses                   | adjusted analyses)                                                               |     |
| 16 |                            |                                                                                  |     |
| 17 |                            |                                                                                  |     |
| 18 | Statistics: analysis       | <a href="#">#20c</a> Definition of analysis population relating to protocol non- | 11  |
| 19 |                            |                                                                                  |     |
| 20 | population and             | adherence (eg, as randomised analysis), and any statistical                      |     |
| 21 |                            |                                                                                  |     |
| 22 | missing data               | methods to handle missing data (eg, multiple imputation)                         |     |
| 23 |                            |                                                                                  |     |
| 24 |                            |                                                                                  |     |
| 25 |                            |                                                                                  |     |
| 26 | <b>Methods: Monitoring</b> |                                                                                  |     |
| 27 |                            |                                                                                  |     |
| 28 |                            |                                                                                  |     |
| 29 | Data monitoring:           | <a href="#">#21a</a> Composition of data monitoring committee (DMC);             | 7   |
| 30 |                            |                                                                                  |     |
| 31 | formal committee           | summary of its role and reporting structure; statement of                        |     |
| 32 |                            |                                                                                  |     |
| 33 |                            | whether it is independent from the sponsor and competing                         |     |
| 34 |                            |                                                                                  |     |
| 35 |                            | interests; and reference to where further details about its                      |     |
| 36 |                            |                                                                                  |     |
| 37 |                            | charter can be found, if not in the protocol. Alternatively, an                  |     |
| 38 |                            |                                                                                  |     |
| 39 |                            | explanation of why a DMC is not needed                                           |     |
| 40 |                            |                                                                                  |     |
| 41 |                            |                                                                                  |     |
| 42 |                            |                                                                                  |     |
| 43 |                            |                                                                                  |     |
| 44 | Data monitoring:           | <a href="#">#21b</a> Description of any interim analyses and stopping            | n/a |
| 45 |                            |                                                                                  |     |
| 46 | interim analysis           | guidelines, including who will have access to these interim                      |     |
| 47 |                            |                                                                                  |     |
| 48 |                            | results and make the final decision to terminate the trial                       |     |
| 49 |                            |                                                                                  |     |
| 50 |                            |                                                                                  |     |
| 51 | Harms                      | <a href="#">#22</a> Plans for collecting, assessing, reporting, and managing     | 12  |
| 52 |                            |                                                                                  |     |
| 53 |                            | solicited and spontaneously reported adverse events and                          |     |
| 54 |                            |                                                                                  |     |
| 55 |                            | other unintended effects of trial interventions or trial                         |     |
| 56 |                            |                                                                                  |     |
| 57 |                            |                                                                                  |     |
| 58 |                            |                                                                                  |     |
| 59 |                            |                                                                                  |     |
| 60 |                            |                                                                                  |     |

|    |                      |                                                                                  |     |
|----|----------------------|----------------------------------------------------------------------------------|-----|
| 1  |                      | conduct                                                                          |     |
| 2  |                      |                                                                                  |     |
| 3  |                      |                                                                                  |     |
| 4  | Auditing             | <a href="#">#23</a> Frequency and procedures for auditing trial conduct, if any, | 7   |
| 5  |                      | and whether the process will be independent from                                 |     |
| 6  |                      |                                                                                  |     |
| 7  |                      |                                                                                  |     |
| 8  |                      | investigators and the sponsor                                                    |     |
| 9  |                      |                                                                                  |     |
| 10 |                      |                                                                                  |     |
| 11 | <b>Ethics and</b>    |                                                                                  |     |
| 12 |                      |                                                                                  |     |
| 13 | <b>dissemination</b> |                                                                                  |     |
| 14 |                      |                                                                                  |     |
| 15 |                      |                                                                                  |     |
| 16 | Research ethics      | <a href="#">#24</a> Plans for seeking research ethics committee / institutional  | 7   |
| 17 |                      | review board (REC / IRB) approval                                                |     |
| 18 | approval             |                                                                                  |     |
| 19 |                      |                                                                                  |     |
| 20 |                      |                                                                                  |     |
| 21 |                      |                                                                                  |     |
| 22 | Protocol             | <a href="#">#25</a> Plans for communicating important protocol modifications     | n/a |
| 23 |                      | (eg, changes to eligibility criteria, outcomes, analyses) to                     |     |
| 24 | amendments           | relevant parties (eg, investigators, REC / IRBs, trial                           |     |
| 25 |                      | participants, trial registries, journals, regulators)                            |     |
| 26 |                      |                                                                                  |     |
| 27 |                      |                                                                                  |     |
| 28 |                      |                                                                                  |     |
| 29 |                      |                                                                                  |     |
| 30 |                      |                                                                                  |     |
| 31 |                      |                                                                                  |     |
| 32 | Consent or assent    | <a href="#">#26a</a> Who will obtain informed consent or assent from potential   | 15  |
| 33 |                      | trial participants or authorised surrogates, and how (see                        |     |
| 34 |                      | Item 32)                                                                         |     |
| 35 |                      |                                                                                  |     |
| 36 |                      |                                                                                  |     |
| 37 |                      |                                                                                  |     |
| 38 |                      |                                                                                  |     |
| 39 | Consent or assent:   | <a href="#">#26b</a> Additional consent provisions for collection and use of     | n/a |
| 40 |                      | participant data and biological specimens in ancillary                           |     |
| 41 | ancillary studies    | studies, if applicable                                                           |     |
| 42 |                      |                                                                                  |     |
| 43 |                      |                                                                                  |     |
| 44 |                      |                                                                                  |     |
| 45 |                      |                                                                                  |     |
| 46 |                      |                                                                                  |     |
| 47 | Confidentiality      | <a href="#">#27</a> How personal information about potential and enrolled        | 12  |
| 48 |                      | participants will be collected, shared, and maintained in                        |     |
| 49 |                      | order to protect confidentiality before, during, and after the                   |     |
| 50 |                      | trial                                                                            |     |
| 51 |                      |                                                                                  |     |
| 52 |                      |                                                                                  |     |
| 53 |                      |                                                                                  |     |
| 54 |                      |                                                                                  |     |
| 55 |                      |                                                                                  |     |
| 56 |                      |                                                                                  |     |
| 57 | Declaration of       | <a href="#">#28</a> Financial and other competing interests for principal        | 15  |
| 58 |                      |                                                                                  |     |
| 59 |                      |                                                                                  |     |
| 60 |                      |                                                                                  |     |

|    |                       |                      |                                                                 |     |
|----|-----------------------|----------------------|-----------------------------------------------------------------|-----|
| 1  | interests             |                      | investigators for the overall trial and each study site         |     |
| 2  |                       |                      |                                                                 |     |
| 3  | Data access           | <a href="#">#29</a>  | Statement of who will have access to the final trial dataset,   | 15  |
| 4  |                       |                      | and disclosure of contractual agreements that limit such        |     |
| 5  |                       |                      | access for investigators                                        |     |
| 6  |                       |                      |                                                                 |     |
| 7  |                       |                      |                                                                 |     |
| 8  |                       |                      |                                                                 |     |
| 9  |                       |                      |                                                                 |     |
| 10 | Ancillary and post    | <a href="#">#30</a>  | Provisions, if any, for ancillary and post-trial care, and for  | n/a |
| 11 | trial care            |                      | compensation to those who suffer harm from trial                |     |
| 12 |                       |                      | participation                                                   |     |
| 13 |                       |                      |                                                                 |     |
| 14 | Dissemination policy: | <a href="#">#31a</a> | Plans for investigators and sponsor to communicate trial        | 14  |
| 15 | trial results         |                      | results to participants, healthcare professionals, the public,  |     |
| 16 |                       |                      | and other relevant groups (eg, via publication, reporting in    |     |
| 17 |                       |                      | results databases, or other data sharing arrangements),         |     |
| 18 |                       |                      | including any publication restrictions                          |     |
| 19 | Dissemination policy: | <a href="#">#31b</a> | Authorship eligibility guidelines and any intended use of       | n/a |
| 20 | authorship            |                      | professional writers                                            |     |
| 21 |                       |                      |                                                                 |     |
| 22 | Dissemination policy: | <a href="#">#31c</a> | Plans, if any, for granting public access to the full protocol, | 15  |
| 23 | reproducible research |                      | participant-level dataset, and statistical code                 |     |
| 24 |                       |                      |                                                                 |     |
| 25 |                       |                      |                                                                 |     |
| 26 |                       |                      |                                                                 |     |
| 27 |                       |                      |                                                                 |     |
| 28 |                       |                      |                                                                 |     |
| 29 |                       |                      |                                                                 |     |
| 30 |                       |                      |                                                                 |     |
| 31 |                       |                      |                                                                 |     |
| 32 |                       |                      |                                                                 |     |
| 33 |                       |                      |                                                                 |     |
| 34 |                       |                      |                                                                 |     |
| 35 |                       |                      |                                                                 |     |
| 36 |                       |                      |                                                                 |     |
| 37 |                       |                      |                                                                 |     |
| 38 |                       |                      |                                                                 |     |
| 39 |                       |                      |                                                                 |     |
| 40 |                       |                      |                                                                 |     |
| 41 | <b>Appendices</b>     |                      |                                                                 |     |
| 42 |                       |                      |                                                                 |     |
| 43 |                       |                      |                                                                 |     |
| 44 | Informed consent      | <a href="#">#32</a>  | Model consent form and other related documentation given        | n/a |
| 45 | materials             |                      | to participants and authorised surrogates                       |     |
| 46 |                       |                      |                                                                 |     |
| 47 |                       |                      |                                                                 |     |
| 48 |                       |                      |                                                                 |     |
| 49 |                       |                      |                                                                 |     |
| 50 | Biological specimens  | <a href="#">#33</a>  | Plans for collection, laboratory evaluation, and storage of     | n/a |
| 51 |                       |                      | biological specimens for genetic or molecular analysis in       |     |
| 52 |                       |                      | the current trial and for future use in ancillary studies, if   |     |
| 53 |                       |                      | applicable                                                      |     |
| 54 |                       |                      |                                                                 |     |
| 55 |                       |                      |                                                                 |     |
| 56 |                       |                      |                                                                 |     |
| 57 |                       |                      |                                                                 |     |
| 58 |                       |                      |                                                                 |     |
| 59 |                       |                      |                                                                 |     |
| 60 |                       |                      |                                                                 |     |

1 None The SPIRIT checklist is distributed under the terms of the Creative Commons Attribution  
2  
3 License CC-BY-ND 3.0. This checklist can be completed online using <https://www.goodreports.org/>, a  
4  
5 tool made by the [EQUATOR Network](#) in collaboration with [Penelope.ai](#)  
6  
7  
8  
9  
10  
11  
12  
13  
14  
15  
16  
17  
18  
19  
20  
21  
22  
23  
24  
25  
26  
27  
28  
29  
30  
31  
32  
33  
34  
35  
36  
37  
38  
39  
40  
41  
42  
43  
44  
45  
46  
47  
48  
49  
50  
51  
52  
53  
54  
55  
56  
57  
58  
59  
60

For peer review only

# BMJ Open

## The effects of transcranial direct current stimulation (tDCS) and concurrent cognitive training on episodic memory in patients with traumatic brain injury: a double-blind, randomized, placebo-controlled study

|                                 |                                                                                                                                                                                                                                                                                                                                                                                                                                                                                                                                                                                                                                                                                                                       |
|---------------------------------|-----------------------------------------------------------------------------------------------------------------------------------------------------------------------------------------------------------------------------------------------------------------------------------------------------------------------------------------------------------------------------------------------------------------------------------------------------------------------------------------------------------------------------------------------------------------------------------------------------------------------------------------------------------------------------------------------------------------------|
| Journal:                        | <i>BMJ Open</i>                                                                                                                                                                                                                                                                                                                                                                                                                                                                                                                                                                                                                                                                                                       |
| Manuscript ID                   | bmjopen-2020-045285.R1                                                                                                                                                                                                                                                                                                                                                                                                                                                                                                                                                                                                                                                                                                |
| Article Type:                   | Protocol                                                                                                                                                                                                                                                                                                                                                                                                                                                                                                                                                                                                                                                                                                              |
| Date Submitted by the Author:   | 13-Mar-2021                                                                                                                                                                                                                                                                                                                                                                                                                                                                                                                                                                                                                                                                                                           |
| Complete List of Authors:       | De Freitas, Daglie; HCFMUSP, Neurology/Neurosurgery<br>De Carvalho, Daniel; HCFMUSP, Neurology/Neurosurgery<br>Paglioni, Vanessa Maria; HCFMUSP, Neurology/Neurosurgery<br>Brunoni, Andre; University of São Paulo, Division of Psychiatry and Psychology<br>Valiengo, Leandro; University of Sao Paulo, Interdisciplinary Center for Applied Neuromodulation and Service of Interdisciplinary Neuromodulation<br>Souza, Maria Sigride; University of Sao Paulo, Psychiatry Department<br>Guirado, Vinícius; HCFMUSP, Division of Neurosurgery<br>Zaninotto, Ana Luiza; MGH Institute of Health Professions, Speech and Feeding Disorders Lab<br>Paiva, Wellingson; University of São Paulo, Division of Neurosurgery |
| <b>Primary Subject Heading</b>: | Neurology                                                                                                                                                                                                                                                                                                                                                                                                                                                                                                                                                                                                                                                                                                             |
| Secondary Subject Heading:      | Rehabilitation medicine                                                                                                                                                                                                                                                                                                                                                                                                                                                                                                                                                                                                                                                                                               |
| Keywords:                       | Neurological injury < NEUROLOGY, Rehabilitation medicine < INTERNAL MEDICINE, Clinical trials < THERAPEUTICS                                                                                                                                                                                                                                                                                                                                                                                                                                                                                                                                                                                                          |
|                                 |                                                                                                                                                                                                                                                                                                                                                                                                                                                                                                                                                                                                                                                                                                                       |

SCHOLARONE™  
Manuscripts



I, the Submitting Author has the right to grant and does grant on behalf of all authors of the Work (as defined in the below author licence), an exclusive licence and/or a non-exclusive licence for contributions from authors who are: i) UK Crown employees; ii) where BMJ has agreed a CC-BY licence shall apply, and/or iii) in accordance with the terms applicable for US Federal Government officers or employees acting as part of their official duties; on a worldwide, perpetual, irrevocable, royalty-free basis to BMJ Publishing Group Ltd ("BMJ") its licensees and where the relevant Journal is co-owned by BMJ to the co-owners of the Journal, to publish the Work in this journal and any other BMJ products and to exploit all rights, as set out in our [licence](#).

The Submitting Author accepts and understands that any supply made under these terms is made by BMJ to the Submitting Author unless you are acting as an employee on behalf of your employer or a postgraduate student of an affiliated institution which is paying any applicable article publishing charge ("APC") for Open Access articles. Where the Submitting Author wishes to make the Work available on an Open Access basis (and intends to pay the relevant APC), the terms of reuse of such Open Access shall be governed by a Creative Commons licence – details of these licences and which [Creative Commons](#) licence will apply to this Work are set out in our licence referred to above.

Other than as permitted in any relevant BMJ Author's Self Archiving Policies, I confirm this Work has not been accepted for publication elsewhere, is not being considered for publication elsewhere and does not duplicate material already published. I confirm all authors consent to publication of this Work and authorise the granting of this licence.

1  
2  
3 **The effects of transcranial direct current stimulation (tDCS) and concurrent**  
4 **cognitive training on episodic memory in patients with traumatic brain injury: a**  
5 **double-blind, randomized, placebo-controlled study**  
6

7  
8 Dagliê Jorge de Freitas<sup>1</sup>, Daniel de Carvalho<sup>1</sup>, Vanessa M. Paglioni<sup>1</sup>, Andre R. Brunoni<sup>2,3</sup>,  
9 Leandro Valiengo<sup>2,3</sup>, Sigride Thome-Souza<sup>4</sup>, Vinicius Monteiro de Paula Guirado<sup>1</sup>, Ana  
10 Luiza Zaninotto<sup>1,5\*</sup>, Wellingson S. Paiva<sup>1\*</sup>  
11

12 \*Sharing the last authorship.  
13

- 14  
15 1. Department of Neurology/ Neurosurgery, Clinics Hospital, Medical School of  
16 University of Sao Paulo (HC-FMUSP), Brazil.  
17 2. Interdisciplinary Center for Applied Neuromodulation and Service of  
18 Interdisciplinary Neuromodulation, LIM-27, University of São Paulo, Brazil  
19 3. Departments of Internal Medicine and Psychiatry, Faculdade de Medicina da  
20 Universidade de São Paulo, Brazil  
21 4. Service of video-electroencephalography, Psychiatry Department, School of  
22 Medicine, University of Sao Paulo, Sao Paulo, Brazil.  
23 5. Speech and Feeding Disorders Lab, MGH Institute of Health Professions  
24 (MGHIHP), Boston, USA.  
25  
26  
27  
28  
29

30 Word count: 3163  
31

32  
33 Corresponding author:

34 Ana Luiza Zaninotto  
35 79/96 13<sup>th</sup> street, 2<sup>nd</sup> floor.  
36 Boston, MA, United States  
37 02129  
38

39 Correspondence: [acostazaninotto@mghihp.edu](mailto:acostazaninotto@mghihp.edu)  
40  
41  
42  
43  
44  
45  
46  
47  
48  
49  
50  
51  
52  
53  
54  
55  
56  
57  
58  
59  
60



## ABSTRACT

**Introduction:** Deficits in episodic memory following traumatic brain injury (TBI) are common and affect independence in activities of daily living. Transcranial direct current stimulation (tDCS) and concurrent cognitive outcomes may contribute to improve episodic memory in patients with TBI. Although previous studies have shown the potential benefits of tDCS to improve cognition, the benefits of the tDCS applied simultaneously to cognitive training are inconsistent. This study aims to (1) investigate whether active tDCS combined with computer-assisted cognitive training enhances episodic memory compared to sham tDCS; (2) to compare the differences between active tDCS applied over the left dorsolateral prefrontal cortex (IDL PFC) and bilateral temporal cortex (BTC) on episodic memory; and (3) investigate inter and intra-group changes on cortical activity measured by quantitative electroencephalogram (qEEG).

**Methods and analysis:** A randomized, parallel-group, double-blind placebo-controlled study is conducted. Thirty-six participants with chronic, moderate, and severe closed TBI are being recruited and randomized into three parallel groups (1:1:1) based on the placement of tDCS sponges and activation (active or sham). TDCS is applied for 10 consecutive days for 20 minutes, combined with a computer-based cognitive training. Cognitive scores and qEEG are collected at baseline, on the last day of the stimulation session, and 3 months after the last tDCS session. We hypothesize that (1) memory scores in the active tDCS group will improve compared to the sham group; (2) BTC and IDL PFC active tDCS memory scores might be significantly different; (3) there will be significant delta reduction and an increase in alpha waves close to the location of the active sponge placement compared to the sham group.

**Ethics and dissemination:** This study was approved by Hospital das Clínicas, University of São Paulo Ethical Institutional Review Board (CAAE: 87954518.0.0000.0068)

**Trial registration number:** ClinicalTrials.gov(NCT04540783).

**Keywords:** traumatic brain injury, episodic memory, transcranial direct current stimulation, cognition, rehabilitation.

## ARTICLE SUMMARY

### Strengths and limitations of this study

- To our knowledge, this protocol is the first randomized controlled trial investigating the effects of the transcranial direct current stimulation (tDCS) and concurrent computer-assisted cognitive training on episodic memory in individuals with TBI.
- This study may contribute to the development of evidence-based low-risk and low-cost rehabilitation treatments for TBI survivors with memory impairments.
- This protocol will investigate how the anodal stimulation of temporal cortex compares to the stimulation of the left dorsolateral prefrontal cortex in terms of episodic memory performance.
- Electroencephalogram (EEG) will be used to evaluate changes in cortical activity after the tDCS intervention.
- Due to sample size restrictions, sex and TBI severity will not be considered as covariates, which might be a limitation of this study.

## INTRODUCTION

Traumatic Brain Injury (TBI) is an alteration in brain function caused by an external force and a major cause of death and disability throughout the world. (1,2) The hippocampus and the prefrontal cortex are among the brain structures more susceptible to lesions after a brain insult and, as a consequence, head injury survivors may experience difficulties in recalling specific events from the personal past and imagining novel scenarios. (3–5) Those regions are known to play important roles in episodic memory, which is a declarative memory containing information about place and time of acquisition as opposed to semantic memory, which refers to memory not tied to the context of encoding. (6) The hippocampus specifically organizes experienced and biographic memories that are defining features of episodic memory, and the pre-frontal cortex suppresses context-inappropriate memories thus allowing the retrieval of context-appropriate memories. (7) After brain trauma, cognitive impairment might be persistent (8) and no available treatments have been shown to be effective to improve those sequels.

Non-invasive brain stimulation (NIBS) techniques, including transcranial direct current stimulation (tDCS), are neuromodulatory interventions that have been shown to improve neuroplasticity and cognitive outcomes in neurological conditions, including TBI. (9,10) tDCS can transiently alter neuronal activity facilitating or inhibiting neuronal circuitries depending on the polarity of the stimulation. (11) tDCS induces neuroplasticity by applying a low-intensity electrical current (0.5 - 2 mA) through electrodes placed on the scalp. The electrodes have two polarities (anode and cathode) and change the resting state of the membrane cells of the surrounding region. (12,13) Previous studies have shown that repetitive tDCS sessions improved disorder of consciousness (11,14,15) and cognition in patients with TBI, (8,16) whereas some studies have shown inconsistent results. (17–19)

1  
2  
3 Since tDCS works on the membrane level, changing the resting state but not  
4 evoking action potential, the use of tDCS with concurrent cognitive training seems to be  
5 a good option to potentiate the stimulation and modulate the brain networks accordingly  
6 to the target training. (20–23) Two prior studies investigated the effects of the use of tDCS  
7 and cognitive training (non-concurrent) on memory and attention performance in TBI  
8 patients, but only one found a significant improvement in the cognitive outcome measures.  
9  
10 (20,22)

11  
12  
13  
14  
15  
16  
17  
18  
19  
20  
21  
22  
23  
24  
25  
26  
27  
28  
29  
30  
31  
32  
33  
34  
35  
36  
37  
38  
39  
40  
41  
42  
43  
44  
45  
46  
47  
48  
49  
50  
51  
52  
53  
54  
55  
56  
57  
58  
59  
60  
Biomarkers that evaluate brain changes after the tDCS intervention are still scarce,  
however the electroencephalogram (EEG) has been suggested to be a useful tool for this  
purpose. (24–29) The EEG measures the rhythm of electrical activity in the brain  
according to its frequency: Delta (1 - 4Hz), Theta (4 - 8Hz), Alpha (8 - 12Hz), Beta (12 -  
30Hz) and Gamma (30 - 40Hz) (27,30,31) and is widely used as a safety outcome in  
patients who undergo tDCS sessions. (32–35) Some studies associate EEG measures  
(amplitude, power, phase and coherence) to the functionality of patients, (36) including  
the diagnosis and prognosis of patients with TBI. (37,38) A study using EEG power  
spectrum (39) suggests that, after 10 tDCS sessions, changes in the rhythm of brain  
activity occur, with reduction of delta and increase of alpha near the active electrodes in  
patients with chronic TBI. This study also found a significant correlation between  
decreases in delta and improved performance on neuropsychological tests for the active  
tDCS group to far greater extent than for the sham group. (24) Other studies have  
measured cortical activity after a single session of tDCS and have shown inconsistent  
results. (24–29) Thus, cortical changes after consecutive sessions of tDCS combined with  
cognitive training in people with TBI are still inconclusive.

Due to the lack of consensus and scarcity of evidence about the effects of cognitive  
training in addition to tDCS sessions in patients with TBI, the goals of this study are (a)

1  
2  
3 to investigate the effect of 10 sessions of tDCS and concurrent cognitive training in  
4 patients with TBI compared to sham tDCS; (b) to analyze differences on episodic memory  
5 scores between active anodal tDCS over the left dorsolateral prefrontal cortex (IDLPF)  
6 and bilateral temporal cortex (BTC); (c) to analyze changes on cortical activities  
7 (measured by the EEG) between the groups. We hypothesize that (a) participants that  
8 received active stimulation will have greater scores on episodic memory test compared to  
9 the sham group; (b) there might be significant score differences on episodic memory test  
10 between patients who were stimulated over the BTC and those stimulated over the IDPFC;  
11 (c) delta reduction and an increase in alpha waves close to the sponge placement in the  
12 active group compared to the sham group.

## 26 **METHODS AND ANALYSIS**

### 29 **Design**

31  
32 This is a randomized, parallel-group, placebo-controlled and double-blind study  
33 that is being conducted at Hospital das Clínicas, University of São Paulo, (HC-FMUSP),  
34 São Paulo, Brazil. Participants who meet eligibility criteria are randomly allocated to (1)  
35 Group 1 - bilateral temporal cortex (BTC); (2) Group 2 - left dorsolateral prefrontal cortex  
36 (IDLPFC); (3) Group 3 – sham (BTC/IDLPFC).

37  
38  
39  
40  
41  
42  
43  
44  
45  
46  
47  
48  
49  
50  
51  
52  
53  
54  
55  
56  
57  
58  
59  
60  
Twenty-minute-tDCS for 10 days (2 weeks, except for Saturdays and Sundays) is  
delivered simultaneously to a computer-assisted cognitive training. Patients will be  
assessed at baseline (T0), at the end of the last stimulation session (T1) and three months  
after the last tDCS session (T2). (Figure 1).

### 53 **Ethics committee and regulatory approval**

56  
57  
58  
59  
60  
The trial is conducted in accordance with the ethical principles outlined in the  
Declaration of Helsinki, 1996. This research was approved by the Hospital das Clínicas,

1  
2  
3 University of São Paulo Ethical Institutional Review Border number CAAE:  
4  
5 87954518.0.0000.0068. Clinical Trial number NCT04540783. Any severe side effect  
6  
7 during the trial will be reported to the safety monitoring board IRB for appropriate  
8  
9 management.  
10  
11

### 12 13 **Randomization and blinding**

14  
15 The investigator ALZ was responsible for the computer-generated random  
16  
17 assignment list, arranging patients in blocks of 3 or 6. The proportion of the  
18  
19 randomization for each group is 1:1:1. This randomized list ensures double blinding so  
20  
21 that both research assistants and patients are blind to the type of stimulation. Before each  
22  
23 stimulation session, the researcher responsible for the stimulation receives a code that  
24  
25 allows the tDCS device to deliver 20 minutes of active or sham stimulation. This blinding  
26  
27 and methodological procedure is similar to the rational of previous studies. (20,22,24)  
28  
29  
30

31  
32 The randomization list and the Neuroconn (tDCS device) code is kept inside a  
33  
34 locked drawer with restricted access at the research coordination office at Hospital das  
35  
36 Clínicas (HC-FMUSP).  
37  
38

### 39 **Recruitment and study population**

40  
41  
42 Thirty-six patients with TBI are being recruited from hospitals in São Paulo. All  
43  
44 participants provide written informed consent and receive an exclusive identification  
45  
46 number during the screening period, to ensure blinding. Study recruitment started in June  
47  
48 2019 and the estimated completion date for the primary outcome is June 2022. We expect  
49  
50 that 85% of the patients will be inpatients from HC-FMUSP referred by neurologists and  
51  
52 15% from extra-mural recruitment (from social media and folders). This trial follows the  
53  
54 CONSORT (Consolidated Standards of Reporting Trials) guidelines.  
55  
56  
57  
58  
59  
60

### **Inclusion criteria**

- Outpatients with radiological diagnosis of TBI at least 6 months prior to enrollment in the study.
- Glasgow Coma Scale (GCS) score  $\leq$  12 at admission in the emergency room.
- Memory complaints, self-reported or reported by the family/ caregiver.
- Age between 18 and 55 years.
- Able to follow directions.

### **Exclusion criteria**

- History of epilepsy post-TBI.
- Clinical EEG abnormalities (epileptiform activity, disorganized background , in other words, a general change in the way a normal brain wave looks – frequency, height and shape).
- Uncorrected visual impairment.
- Contraindications to tDCS, such as medical devices implanted in the brain or metallic foreign body in the head.
- Current severe/major depression (score over 36 points on the Beck Depression Inventory – 2<sup>nd</sup> edition).
- Current severe anxiety (score over 26 points on the Beck Anxiety Inventory).
- Limiting motor deficit.
- Estimated IQ under 70.
- Time after trauma > 18 months

### **Patient and public involvement**

Patients are not involved in the design, or conduct, or reporting, or dissemination plans of our research.

## Instruments

Patients are expected to come to the research hospital for 11 visits as described in

Table 1.

Table 1: Detail of the study visits.

|                        | Tasks | Visit 1<br>Baseline | Visit<br>2-9 | Visit<br>10 | Visit 11<br>3 months<br>follow-up |
|------------------------|-------|---------------------|--------------|-------------|-----------------------------------|
| Consent Form           | X     |                     |              |             |                                   |
| <b>Screening</b>       |       |                     |              |             |                                   |
| Medical history        | X     |                     |              |             |                                   |
| qEEG                   | X     |                     |              | X           | X                                 |
| BDI-II                 | X     |                     |              | X           | X                                 |
| BAI                    | X     |                     |              | X           | X                                 |
| Estimated IQ           | X     |                     |              |             |                                   |
| <b>Episodic Memory</b> |       |                     |              |             |                                   |
| RAVLT                  |       | X                   |              | X           | X                                 |
| <b>Intervention</b>    |       |                     |              |             |                                   |
| tDCS                   |       | X                   | X            | X           |                                   |
| Cognitive Training     |       | X                   | X            | X           |                                   |
| AEQ                    |       | X                   | X            | X           |                                   |

Legend: AEQ – Adverse Events Questionnaire; BAI - Beck Anxiety Inventory; BDI-II - Beck Depression Inventory; qEEG – Quantitative Electroencephalogram; IQ – Intelligence quotient, tDCS – Transcranial Direct Current Stimulation, RAVLT - Rey Auditory Verbal Learning Test.

### Screening assessment:

Depressive symptoms - BDI-II - Beck Depression Inventory (40)

Anxiety symptoms - BAI - Beck Anxiety Inventory (41)

Estimated IQ - WAIS - Wechsler Adult Intelligence Scale (Matrix Reasoning and Vocabulary) (42,43).

### Primary outcome (Episodic Memory)

Rey Auditory Verbal Learning Test (RAVLT) - A list of 15 words is presented, and subjects are asked to say all words they can remember. The process is repeated 5 times. Twenty minutes after the 5th trial, an interference list of 15 words (List B) is presented, followed by a free-recall test of that list. Immediately after this, delayed recall of the first list is tested (Trial 6) without further presentation of those words. After a 20-



1  
2  
3 min delay period, subjects are again required to recall words from List A (Trial 7). Finally,  
4  
5 recognition can be tested with the use of a matrix array, in which the individual must  
6  
7 identify List A words from a list of 50 words containing all items from Lists A and B and  
8  
9 20 words that are phonemically or semantically similar to those in Lists A and B. (44)  
10  
11  
12 The 7<sup>th</sup> trial of the list A will be used as primary outcome.  
13  
14

### 15 **Secondary outcome**

16  
17 EEG assessment. The exam is performed on the Nihon Kohden® EEG 1200  
18  
19 version 01.71 digital equipment, with simultaneous video recording with a Sony® Ipela  
20  
21 camera. For qualitative EEG data collection, we use the international 10-20 electrode  
22  
23 placement system, 19 channels (being one to electrocardiogram), with sampling rate of  
24  
25 200Hz, a time of 0.3, high filter from 35 to 70 Hz and sensitivity of 7  $\mu$ V. For the  
26  
27 quantitative analysis, the data are converted using Neuromap from the Neuroworkbench  
28  
29 software. The exam lasts 30 minutes (15 minutes with your eyes open and 15 minutes  
30  
31 with your eyes closed - relaxed wakefulness). The analyses are performed by a certified  
32  
33 neurophysiologist (STS).  
34  
35  
36  
37  
38

### 39 **Safety screening**

40  
41 Adverse Events Questionnaire (AEQ): Questionnaire that must be answered after  
42  
43 each stimulation session to assess adverse effects such as tingling sensations, itching, mild  
44  
45 transient redness of the skin and discomfort on the region of stimulation, moderate fatigue,  
46  
47 difficulty concentrating, headache, and nauseas. (45)  
48  
49  
50

### 51 **Intervention**

#### 52 *Transcranial direct current stimulation (tDCS)*

53  
54 Both anodal and sham tDCS will be delivered by the same battery-driven  
55  
56 (NeuroConn: DC Stimulator Plus), for 20 minutes. The research assistant will set up the  
57  
58  
59  
60

1  
2  
3 device according to the assignment list in order of participant's registration number.  
4  
5 Saline-soaked surface 35cm<sup>2</sup> (5cm X 7cm) sponge electrodes connected to the stimulator  
6  
7 will be placed upon the patient's scalp and secured with adjustable rubber straps.  
8  
9

10 The sponge placement follows the 10-20 EEG system. Group 1 - bilateral  
11 temporal cortex (BTC) - two anode electrodes are placed over T3 and T4 respectively,  
12 and the cathode electrode over the supraorbital region (FP2). Group 2 – left dorsolateral  
13 prefrontal cortex (IDL PFC), the anode electrode is placed over F3 and the cathode over  
14 FP2. Group 3 – sham group – half of the participants are following the montage of group  
15 1 (BTC) and the other half from group 2 (IDL PFC). T3, T4 and F3 regions have been  
16 chosen for this protocol because other studies have investigated the effects of tDCS on  
17 memory by placing the electrodes over those regions. (46–55) For the sham stimulation,  
18 patients receive the active current with ramping up and down for 30 seconds to simulate  
19 the real stimulation over the BTC or IDL PFC, as referred by other studies. (56,57) Patients  
20 are monitored daily for side effects, according to international safety guidelines, and with  
21 the Adverse Events Questionnaire (AEQ). (45)

### 32 *Cognitive Training*

33 The Rehacom is a cognitive software for patients with different etiologies  
34 approved by the Brazilian Health Regulatory Agency (ANVISA). This software has  
35 several cognitive modules. For the purpose of the present study, we are using the  
36 attentional visual and verbal memory training tasks with increasing levels of difficulty  
37 according to the patient's performance. During the training, the feedback option is active,  
38 so the patient can be oriented and improve his/her performance over the trials. The initial  
39 level is adjusted to level 1 for all patients who have incomplete high school, for those  
40 who complete high school the starting level is 4, and for those with complete college, the  
41 starting level is 5. (58–60)

1  
2  
3 The cognitive training follows two possible random sequence order – memory/  
4 attention or attention/memory modules, always alternating daily up to the end of the last  
5 stimulation session. Each training has a 20-minute duration, always combined with the  
6 tDCS.  
7  
8  
9  
10  
11  
12

### 13 **Sample size calculation**

14  
15 The sample calculation was performed using the software GPower 3.1, using the  
16 statistical 2-way ANOVA (3 groups and 3 timepoints), a given  $\alpha$  5%, power 80% and,  
17 interaction effect of 0.25 considering the primary outcome, based on our pilot data. G  
18 power analysis provided a sample size of 36 participants based on the F calculation (12  
19 patients per group).  
20  
21  
22  
23  
24  
25  
26  
27

### 28 **Statistical analysis**

29  
30  
31 Descriptive statistics are used to report demographic data. Kolmogorov-Smirnov  
32 test was used to test data normality. To analyze the primary outcome, changes on episodic  
33 memory (RAVLT scores), we will use ANOVA for normal data distribution or non-  
34 parametric tests. We assume that each participant has a random effect on the model. For  
35 the secondary outcome (EEG spectral power), we plan to use the mixed effect model  
36 (reml), considering group and time as fixed factors and each participant as a random effect.  
37  
38  
39  
40  
41  
42  
43  
44  
45  
46  
47  
48  
49  
50  
51  
52  
53  
54  
55  
56  
57  
58  
59  
60  
Estimated alpha value of 5%. An intention-to-treat framework will be applied.

### 58 **Ethics and dissemination**

59  
60  
61  
62  
63  
64  
65  
66  
67  
68  
69  
70  
71  
72  
73  
74  
75  
76  
77  
78  
79  
80  
81  
82  
83  
84  
85  
86  
87  
88  
89  
90  
91  
92  
93  
94  
95  
96  
97  
98  
99  
100  
TDCS is a safe intervention not only because the electric current applied is very  
low (0.5 - 2mA over a 25-35 cm<sup>2</sup> area), but also because the electrodes embedded in saline  
solution minimize tissue resistance, avoid overheating. Tingling sensations, itching, mild  
transient redness of the skin and discomfort on the region of stimulation, moderate fatigue,  
difficulty concentrating, headache and nausea are possible adverse effects, but these

1  
2  
3 effects do not usually last long and are often seen at the same frequency in experimental  
4 and placebo groups. (10,61,62) The safety side-effect questionnaire (AEQ (45)) is  
5 collected after each stimulation session. Complaints regarding the stimulation or high  
6 AEQ scores are reported to the safety board and the medical coverage may be called for  
7 necessary care. Written informed consent for participation in the study will be obtained  
8 from all participants. Participant information is stored securely in locked file cabinets and  
9 participant digital information is password protected.  
10  
11  
12  
13  
14  
15  
16  
17  
18

## 19 **DISCUSSION**

20  
21  
22 In order to contribute to the development of evidence-based rehabilitation  
23 treatments to TBI survivors with memory impairments, the present study aims to  
24 investigate whether the use of tDCS targeting the BTC or the IDLFFC with concurrent  
25 computer-based cognitive training improves memory performance in patients with  
26 moderate and severe closed TBI patients.  
27  
28  
29  
30  
31  
32

33  
34 Since TBI causes health loss and disability for individuals and their families (63)  
35 and memory impairment is one of the most frequent cognitive complaints, (64,65) an  
36 effective rehabilitation tool will be helpful to improve this burden in this population.  
37  
38  
39

40  
41 There is evidence that tDCS may improve cognitive impairments, such as memory  
42 impairments, following TBI and other etiologies. (49,50) Prior research has shown the  
43 efficacy of anodal tDCS in improving memory performance during tasks such as face-  
44 name associative recall tasks, intentional memorization of words, figure-naming tests,  
45 word recall and picture-pseudoword associative learning tasks. (51–55) A recent  
46 systematic review found 14 experimental studies on adult TBI patients who received  
47 tDCS for the assessment of clinical or surrogate outcomes (66) and, to our knowledge,  
48 only two studies used tDCS concomitant to cognitive training (non-concurrent) in TBI  
49 patients. (20–22)  
50  
51  
52  
53  
54  
55  
56  
57  
58  
59  
60

1  
2  
3 Despite some disadvantages, namely poor spatial/temporal resolution and  
4 stimulation of large part of the brain, there are many advantages to tDCS, such as low  
5 risk of adverse effects and low cost. (67) It has been proven that tDCS does not induce  
6 depolarization, meaning it does not induce the firing of neurons when they are not near  
7 threshold. Therefore, it is less likely that neurons not engaged in the task at hand will  
8 discharge, hence the importance of applying tDCS during a specific task in order to target  
9 a particular circuitry. (23) It has also been suggested that more systematic investigations  
10 are needed, due to the heterogeneity of findings in tDCS research and the different  
11 parameters used in the stimulation. (52,68)

12  
13  
14 EEG will be used to guarantee safety (32–35) and to measure cortical activity post  
15 intervention. Spikes and abnormal waves shown on the EEG will provide clinical  
16 guidance on whether to include the participant in the present study. We expect to reduce  
17 delta activities and increase alpha frequencies close to the active electrodes and find a  
18 better performance correlation in neuropsychological tests in the active group, as  
19 demonstrated previously. (24)

20  
21  
22 One limitation of this study is that, due to sample size restrictions, sex and TBI  
23 severity will not be considered as covariates. Severe TBI and moderate TBI are  
24 considered as a single entity for investigation purposes in many studies, in part because  
25 of the permanent physical, cognitive and behavioral impairments that are observed in  
26 such patients in comparison to mild TBI patients. As for sex differences, a recent study  
27 aimed at characterizing the demographic, social and economic profile of TBI patients in  
28 Brazil showed that men were hospitalized almost 3.5 times more frequently for TBI than  
29 women and that the incidence of TBI in the male population was 102/100,000/year. (69–  
30 71)

1  
2  
3 This is a study to test the effectiveness of combined tDCS and cognitive training  
4 to improve episodic memory in patients with TBI. The results generated may potentially  
5 be useful for other neurological disorders that cause cognitive impairments. Our open-  
6 label pilot study (n=4 participants) has proven the feasibility of the method and a  
7 moderate effect size of the RAVLT scores between the baseline to the last tDCS session.  
8 Results will be presented at conferences and submitted for publication in peer-reviewed  
9 journals.

### 19 **Trial Status**

20  
21  
22 This trial was registered on the website clinicaltrials.gov with the registration  
23 number NCT04540783. The open-label pilot study was performed with 4 participants in  
24 2018 and validated the study protocol. Recruitment started in February 2019. At the time  
25 of submission of this paper, we had completed 15 participants. The programmed  
26 completion date for the primary outcome is June 2022.

27  
28 This study will provide important data regarding the use of the combined tools to  
29 improve the memory of persons that suffer from the sequela of a TBI. Larger clinical trial  
30 studies are required to further interrogate the clinical efficacy of this technique to improve  
31 the mood and the quality of life of this target population.

### 33 **Acknowledgements**

34  
35 The authors thank the Institute of Psychiatry, Hospital das Clínicas (IPq HCFMUSP), the  
36 secretary Sandra Aparecida de Lima Falcon and all participants and their families for their  
37 support and assistance.

### 39 **Conflicts of Interests**

40  
41 Authors report no conflict of interests.

## Data

Technical appendix, statistical code, and dataset will be available from the following link:

<https://drive.google.com/file/d/1WLV4yowqcyU5DuHW9PBI3FQtNrS2WKWe/view?usp=sharing>

## Author Contributions

Research project: Conception – ALZ, WSP.

Organization – ALZ, WSP, ARB, LV, VMG.

Execution – DJF, VMP, DC, STS.

Statistical Analysis: Design – ALZ, WSP, ARB

Manuscript Preparation: First draft – DJF. Final draft – DJF, VMP, DC, ALZ

Review and Critique: ALZ, ARB, LV, VMG, DC, DJF, VMP.

## Funding

Vanessa M. Paglioni reports grant from Coordination for the Improvement of Higher Education Personnel (CAPES) – Brazil.

Dr. Ana Luiza Zaninotto is supported by the National Institute of Health 3R01DC017291 – 02.

Dr. Wellingson Silva Paiva is supported by the NIHR Global Health Research Group on Neurotrauma, which was commissioned by the National Institute for Health Research (NIHR) using UK aid from the UK Government (project 16/137/105).

The views expressed in this publication are those of the author(s) and not necessarily those of the NIH, NIDCD, NIHR or the Department of Health and Social Care.

## ORCID IDs

Dagliê Jorge de Freitas <https://orcid.org/0000-0002-2473-6210>

Daniel de Carvalho <https://orcid.org/0000-0003-4960-0800>

Vanessa M. Paglioni <https://orcid.org/0000-0002-8008-2231>

1  
2  
3 Andre R. Brunoni <https://orcid.org/0000-0002-6310-3571>  
4

5 Leandro Valiengo <https://orcid.org/0000-0002-7628-9993>  
6

7 Sigride Thome-Souza <https://orcid.org/0000-0002-3017-6723>  
8

9 Vinicius Monteiro de Paula Guirado <https://orcid.org/0000-0002-7782-3609>  
10

11 Ana Luiza Zaninotto <https://orcid.org/0000-0003-0639-0612>  
12

13 Wellingson S. Paiva <https://orcid.org/0000-0002-5165-7040>  
14  
15

16  
17  
18 **Legend for Figure 1:** Figure 1 CONSORT Flow Diagram  
19  
20  
21  
22  
23  
24  
25  
26  
27  
28  
29  
30  
31  
32  
33  
34  
35  
36  
37  
38  
39  
40  
41  
42  
43  
44  
45  
46  
47  
48  
49  
50  
51  
52  
53  
54  
55  
56  
57  
58  
59  
60



## REFERENCES

1. Menon DK, Schwab K, Wright DW, Maas AI. Position statement: Definition of traumatic brain injury. Vol. 91, Archives of Physical Medicine and Rehabilitation. W.B. Saunders; 2010. p. 1637–40.
2. Gentleman SM, Roberts GW, Gennarelli TA, Maxwell WL, Adams JH, Kerr S, et al. Axonal injury: a universal consequence of fatal closed head injury? *Acta Neuropathol.* 1995;89(6):537–43.
3. Miotto EC, Cinalli FZ, Serrao VT, Benute GG, Lucia MCS, Scaff M. Cognitive deficits in patients with mild to moderate traumatic brain injury. *Arq Neuropsiquiatr* [Internet]. 2010 [cited 2020 Jun 25];68(6):862–8. Available from: [http://www.scielo.br/scielo.php?script=sci\\_arttext&pid=S0004-282X2010000600006&lng=en&nrm=iso&tlng=en](http://www.scielo.br/scielo.php?script=sci_arttext&pid=S0004-282X2010000600006&lng=en&nrm=iso&tlng=en)
4. Wright MJ, Schmitter-Edgecombe M. The impact of verbal memory encoding and consolidation deficits during recovery from moderate-to-severe traumatic brain injury. *J Head Trauma Rehabil.* 2011;26(3):182–91.
5. Vakil E, Greenstein Y, Weiss I, Shtein S. The Effects of Moderate-to-Severe Traumatic Brain Injury on Episodic Memory: a Meta-Analysis. *Neuropsychol Rev.* 2019;29(3):270–87.
6. Moscovitch M, Cabeza R, Winocur G, Nadel L. Episodic Memory and Beyond: The Hippocampus and Neocortex in Transformation. *Annu Rev Psychol.* 2016;67(1):105–34.
7. Eichenbaum H. Prefrontal-hippocampal interactions in episodic memory. *Nat Rev Neurosci* [Internet]. 2017;18(9):547–58. Available from: <http://dx.doi.org/10.1038/nrn.2017.74>
8. Ponsford JL, Downing MG, Olver J, Ponsford M, Acher R, Carty M, et al. Longitudinal follow-up of patients with traumatic brain injury: Outcome at two, five, and ten years post-injury. *J Neurotrauma.* 2014;31(1):64–77.
9. Michael A, Nitsche, David Liebetanz NL, Andrea Antal, Frithjof Tergau WP. Safety criteria for transcranial direct current stimulation (tDCS) in humans. *Clin Neurophysiol.* 2003;114:2220–2.
10. Nitsche MA, Cohen LG, Wassermann EM, Priori A, Lang N, Antal A, et al. Transcranial direct current stimulation: State of the art 2008. *Brain Stimul.* 2008;1(3):206–23.
11. Levin HS. Memory deficit after closed-head injury. *J Clin Exp Neuropsychol.* 1990;12(1):129–53.
12. Li S, Zaninotto AL, Neville IS, Paiva WS, Nunn D, Fregni F. Clinical utility of brain stimulation modalities following traumatic brain injury: Current evidence. *Neuropsychiatr Dis Treat.* 2015;11:1573–86.
13. Amatachaya A, Auvichayapat N, Patjanasontorn N, Suphakunpinyo C, Ngernyam N, Aree-uea B, et al. Effect of Anodal Transcranial Direct Current Stimulation on Autism: A Randomized Double-Blind Crossover Trial. *Behav Neurol.* 2014;2014:1–7.
14. Palacios EM, Sala-Llloch R, Junque C, Fernandez-Espejo D, Roig T, Tormos JM, et al. Long-term declarative memory deficits in diffuse TBI: Correlations with cortical thickness, white matter integrity and hippocampal volume. *Cortex* [Internet]. 2013;49(3):646–57. Available from: <http://dx.doi.org/10.1016/j.cortex.2012.02.011>
15. Sozda CN, Muir JJ, Springer US, Partovi D, Cole MA. Differential learning and memory performance in OEF/OIF veterans for verbal and visual material.

- 1  
2  
3 Neuropsychology. 2014;28(3):347–52.
- 4 16. Zaninotto AL, Vicentini JE, Solla DJF, Silva TT, De Paula Guirado VM, Feltrin  
5 F, et al. Visuospatial memory improvement in patients with diffuse axonal injury  
6 (DAI): A 1-year follow-up study. *Acta Neuropsychiatr*. 2017;29(1):35–42.
- 7 17. Estraneo A, Pascarella A, Moretta P, Masotta O, Fiorenza S, Chirico G, et al.  
8 Repeated transcranial direct current stimulation in prolonged disorders of  
9 consciousness: A double-blind cross-over study. *J Neurol Sci* [Internet].  
10 2017;375:464–70. Available from: <http://dx.doi.org/10.1016/j.jns.2017.02.036>
- 11 18. Wilke S, List J, Mekle R, Lindenberg R, Bukowski M, Ott S, et al. No effect of  
12 anodal tDCS on GABA levels in patients with recurrent mild traumatic brain  
13 injury. *J Neurotrauma*. 2016;1–50.
- 14 19. Kang EK, Kim DY, Paik NJ. Transcranial direct current stimulation of the left  
15 prefrontal cortex improves attention in patients with traumatic brain injury: A  
16 pilot study. *J Rehabil Med*. 2012;44(4):346–50.
- 17 20. Leśniak M, Polanowska K, Seniów J, Członkowska A. Effects of repeated anodal  
18 tDCS coupled with cognitive training for patients with severe traumatic brain  
19 injury: A pilot randomized controlled trial. *J Head Trauma Rehabil*. 2014;29(3).
- 20 21. Galetto V, Sacco K. Neuroplastic Changes Induced by Cognitive Rehabilitation  
21 in Traumatic Brain Injury: A Review. *Neurorehabil Neural Repair*.  
22 2017;31(9):800–13.
- 23 22. Sacco K, Galetto V, Dimitri D, Geda E, Perotti F, Zettin M, et al. Concomitant  
24 use of transcranial direct current stimulation and computer-assisted training for  
25 the rehabilitation of attention in traumatic brain injured patients: Behavioral and  
26 neuroimaging results. *Front Behav Neurosci*. 2016;10(MAR):1–11.
- 27 23. Miniussi C, Harris JA, Ruzzoli M. Modelling non-invasive brain stimulation in  
28 cognitive neuroscience. *Neurosci Biobehav Rev* [Internet]. 2013;37(8):1702–12.  
29 Available from: <http://dx.doi.org/10.1016/j.neubiorev.2013.06.014>
- 30 24. Ulam F, Shelton C, Richards L, Davis L, Hunter B, Fregni F, et al. Cumulative  
31 effects of transcranial direct current stimulation on EEG oscillations and  
32 attention/working memory during subacute neurorehabilitation of traumatic brain  
33 injury. *Clin Neurophysiol* [Internet]. 2015;126(3):486–96. Available from:  
34 <http://dx.doi.org/10.1016/j.clinph.2014.05.015>
- 35 25. Keeser D, Padberg F, Reisinger E, Pogarell O, Kirsch V, Palm U, et al. Prefrontal  
36 direct current stimulation modulates resting EEG and event-related potentials in  
37 healthy subjects: A standardized low resolution tomography (sLORETA) study.  
38 *Neuroimage* [Internet]. 2010;55(2):644–57. Available from:  
39 <http://dx.doi.org/10.1016/j.neuroimage.2010.12.004>
- 40 26. Balconi M, Vitaloni S. The tDCS effect on alpha brain oscillation for correct vs.  
41 incorrect object use. The contribution of the left DLPFC. *Neurosci Lett*  
42 [Internet]. 2012;517(1):25–9. Available from:  
43 <http://dx.doi.org/10.1016/j.neulet.2012.04.010>
- 44 27. Maeoka H, Matsuo A, Hiyamizu M, Morioka S, Ando H. Influence of  
45 transcranial direct current stimulation of the dorsolateral prefrontal cortex on pain  
46 related emotions: A study using electroencephalographic power spectrum  
47 analysis. *Neurosci Lett* [Internet]. 2012;512(1):12–6. Available from:  
48 <http://dx.doi.org/10.1016/j.neulet.2012.01.037>
- 49 28. Jacobson L, Ezra A, Berger U, Lavidor M. Modulating oscillatory brain activity  
50 correlates of behavioral inhibition using transcranial direct current stimulation.  
51 *Clin Neurophysiol* [Internet]. 2012;123(5):979–84. Available from:  
52 <http://dx.doi.org/10.1016/j.clinph.2011.09.016>
- 53  
54  
55  
56  
57  
58  
59  
60

- 1
  - 2
  - 3
  - 4
  - 5
  - 6
  - 7
  - 8
  - 9
  - 10
  - 11
  - 12
  - 13
  - 14
  - 15
  - 16
  - 17
  - 18
  - 19
  - 20
  - 21
  - 22
  - 23
  - 24
  - 25
  - 26
  - 27
  - 28
  - 29
  - 30
  - 31
  - 32
  - 33
  - 34
  - 35
  - 36
  - 37
  - 38
  - 39
  - 40
  - 41
  - 42
  - 43
  - 44
  - 45
  - 46
  - 47
  - 48
  - 49
  - 50
  - 51
  - 52
  - 53
  - 54
  - 55
  - 56
  - 57
  - 58
  - 59
  - 60
29. Miller J, Berger B, Sauseng P. Anodal transcranial direct current stimulation (tDCS) increases frontal-midline theta activity in the human EEG: A preliminary investigation of non-invasive stimulation. *Neurosci Lett* [Internet]. 2015;588:114–9. Available from: <http://dx.doi.org/10.1016/j.neulet.2015.01.014>
30. St. Louis E, Frey L, Britton J, Hopp J, Korb P, Koubeissi M, et al. *Electroencephalography (EEG): An Introductory Text and Atlas of Normal and Abnormal Findings in Adults, Children, and Infants*. Electroencephalography (EEG): An Introductory Text and Atlas of Normal and Abnormal Findings in Adults, Children, and Infants. 2016. 1–96 p.
31. Hughes J. *EEG in clinical practice*. 2nd ed. Washington Street Newton: Butterworth-Heinemann; 1994. 242 p.
32. Liu A, Bryant A, Jefferson A, Friedman D, Minhas P, Barnard S, et al. Exploring the efficacy of a 5-day course of transcranial direct current stimulation (TDCS) on depression and memory function in patients with well-controlled temporal lobe epilepsy. *Epilepsy Behav*. 2016;55:11–20.
33. Antal A, Boros K, Poreisz C, Chaieb L, Terney D, Paulus W. Comparatively weak after-effects of transcranial alternating current stimulation (tACS) on cortical excitability in humans. *Brain Stimul*. 2008;1(2):97–105.
34. Zaehle T, Sandmann P, Thorne JD, Jäncke L, Herrmann CS. Transcranial direct current stimulation of the prefrontal cortex modulates working memory performance: Combined behavioural and electrophysiological evidence. *BMC Neurosci*. 2011;12:9–14.
35. Tadini L, El-Nazer R, Brunoni AR, Williams J, Carvas M, Boggio P, et al. Cognitive, mood, and electroencephalographic effects of noninvasive cortical stimulation with weak electrical currents. *J ECT*. 2011;27(2):134–40.
36. Hannawi Y, Stevens RD. Mapping the connectome following traumatic brain injury. *Curr Neurol Neurosci Rep*. 2016;16(5).
37. Marceglia S, Mrakic-Spota S, Rosa M, Ferrucci R, Mameli F, Vergari M, et al. Transcranial direct current stimulation modulates cortical neuronal activity in Alzheimer’s disease. *Front Neurosci*. 2016;10(MAR):1–11.
38. Roche RAP, Dockree PM, Garavan H, Foxe JJ, Robertson IH, O’Mara SM. EEG alpha power changes reflect response inhibition deficits after traumatic brain injury (TBI) in humans. *Neurosci Lett*. 2004;362(1):1–5.
39. Dressler O, Schneider G, Stockmanns G, Kochs EF. Awareness and the EEG power spectrum: Analysis of frequencies. *Br J Anaesth*. 2004;93(6):806–9.
40. Gorenstein C, Wang YP, Argimon I de L, Werlang BSG. *Manual do Inventário de depressão de Beck-BDI-II*. 1st ed. São Paulo: Editora Casa do Psicólogo; 2011. 172 p.
41. Cunha JA. *Manual da versão em português das Escalas Beck*. 1st ed. Casa do Psicólogo; 2001. 171 p.
42. Denney DA, Ringe WK, Lacritz LH. Dyadic short forms of the Wechsler Adult Intelligence Scale-IV. *Arch Clin Neuropsychol*. 2015;30(5):404–12.
43. Wechsler D. *WAIS-III: Escala de inteligência Wechsler para adultos: manual técnico*. 1st ed. São Paulo: Casa do Psicólogo; 2004. 276 p.
44. De Paula J, Fernandes Malloy-Diniz L. *Teste de Aprendizagem Auditivo-Verbal de Rey (RAVLT)*. São Paulo: Vetor Editora Psico-Pedagógica Ltda.; 2018.
45. Brunoni AR, Amadera J, Berbel B, Volz MS, Rizzerio BG, Fregni F. A systematic review on reporting and assessment of adverse effects associated with transcranial direct current stimulation. *Int J Neuropsychopharmacol*. 2011;14(8):1133–45.

- 1
  - 2
  - 3
  - 4
  - 5
  - 6
  - 7
  - 8
  - 9
  - 10
  - 11
  - 12
  - 13
  - 14
  - 15
  - 16
  - 17
  - 18
  - 19
  - 20
  - 21
  - 22
  - 23
  - 24
  - 25
  - 26
  - 27
  - 28
  - 29
  - 30
  - 31
  - 32
  - 33
  - 34
  - 35
  - 36
  - 37
  - 38
  - 39
  - 40
  - 41
  - 42
  - 43
  - 44
  - 45
  - 46
  - 47
  - 48
  - 49
  - 50
  - 51
  - 52
  - 53
  - 54
  - 55
  - 56
  - 57
  - 58
  - 59
  - 60
46. Ross LA, McCoy D, Coslett HB, Olson IR, Wolk DA. Improved proper name recall in aging after electrical stimulation of the anterior temporal lobes. *Front Aging Neurosci.* 2011;3(OCT):1–8.
47. Jeong Yun G, Ho Chun M, Ryun Kim B. The Effects of Transcranial Direct-Current Stimulation on Cognition in Stroke Patients. 2015; Available from: <http://j-stroke.org>
48. Boggio PS, Khoury LP, Martins DCS, Martins OEMS, De Macedo EC, Fregni F. Temporal cortex direct current stimulation enhances performance on a Visual recognition memory task in Alzheimer disease. *J Neurol Neurosurg Psychiatry.* 2009;80(4):444–7.
49. Sandrini M, Brambilla M, Manenti R, Rosini S, Cohen LG, Cotelli M. Noninvasive stimulation of prefrontal cortex strengthens existing episodic memories and reduces forgetting in the elderly. *Front Aging Neurosci.* 2014;6(OCT):1–9.
50. Park SH, Koh EJ, Choi HY, Ko MH. A double-blind, sham-controlled, pilot study to assess the effects of the concomitant use of transcranial direct current stimulation with the computer assisted cognitive rehabilitation to the prefrontal cortex on cognitive functions in patients with stroke. *J Korean Neurosurg Soc.* 2013;54(6):484–8.
51. Leshikar ED, Leach RC, McCurdy MP, Trumbo MC, Sklenar AM, Frankenstein AN, et al. Transcranial direct current stimulation of dorsolateral prefrontal cortex during encoding improves recall but not recognition memory. *Neuropsychologia* [Internet]. 2017;106:390–7. Available from: <https://doi.org/10.1016/j.neuropsychologia.2017.10.022>
52. Medvedeva A, Materassi M, Neacsu V, Beresford-Webb J, Hussin A, Khan N, et al. Effects of Anodal Transcranial Direct Current Stimulation Over the Ventrolateral Prefrontal Cortex on Episodic Memory Formation and Retrieval. *Cereb Cortex.* 2019;29(2):657–65.
53. Fileccia E, Di Stasi V, Poda R, Rizzo G, Stanzani-Maserati M, Oppi F, et al. Effects on cognition of 20-day anodal transcranial direct current stimulation over the left dorsolateral prefrontal cortex in patients affected by mild cognitive impairment: a case-control study. *Neurol Sci.* 2019;40(9):1865–72.
54. Sandrini M, Manenti R, Gobbi E, Rusich D, Bartl G, Cotelli M. Transcranial direct current stimulation applied after encoding facilitates episodic memory consolidation in older adults. *Neurobiol Learn Mem* [Internet]. 2019;163(January):107037. Available from: <https://doi.org/10.1016/j.nlm.2019.107037>
55. Antonenko D, Thams F, Uhrich J, Dix A, Thurm F, Li SC, et al. Effects of a multi-session cognitive training combined with brain stimulation (TRAINSTIM-COG) on age-associated cognitive decline – Study protocol for a randomized controlled phase IIb (MONOCENTER) trial. *Front Aging Neurosci.* 2019;10(JUL):1–12.
56. Bikson M, Grossman P, Thomas C, Zannou AL, Jiang J, Adnan T, et al. Safety of Transcranial Direct Current Stimulation: Evidence Based Update 2016. *Brain Stimul* [Internet]. 2016;9(5):641–61. Available from: <http://dx.doi.org/10.1016/j.brs.2016.06.004>
57. Antal A, Alekseichuk I, Bikson M, Brockmüller J, Brunoni AR, Chen R, et al. Low intensity transcranial electric stimulation: Safety, ethical, legal regulatory and application guidelines. *Clin Neurophysiol* [Internet]. 2017;128(9):1774–809. Available from: <http://dx.doi.org/10.1016/j.clinph.2017.06.001>



- 1  
2  
3 58. Fernandez E, Bergado Rosado JA, Perez DR, Santana SS, Aguilar MT, Bringas  
4 ML. Effectiveness of a computer-based training program of attention and  
5 memory in patients with acquired brain damage. *Behav Sci (Basel)*. 2018;8(1).  
6 59. Yoo C, Yong MH, Chung J, Yang Y. Effect of computerized cognitive  
7 rehabilitation program on cognitive function and activities of living in stroke  
8 patients. *J Phys Ther Sci*. 2015;27(8):2487–9.  
9 60. Veisi-Pirkoochi S, Hassani-Abharian P, Kazemi R, Vaseghi S, Zarrindast MR,  
10 Nasehi M. Efficacy of RehaCom cognitive rehabilitation software in activities of  
11 daily living, attention and response control in chronic stroke patients. *J Clin*  
12 *Neurosci* [Internet]. 2020;71:101–7. Available from:  
13 <https://doi.org/10.1016/j.jocn.2019.08.114>  
14 61. Brunoni A, Nitsche M, Bolognini N, Bikson M, Wagner T, Merabet L, et al.  
15 Clinical research with tDCS: Challenges and future directions. *Brain Stimul*.  
16 2012;5(3):175–95.  
17 62. de Amorim RLO, Brunoni AR, de Oliveira MAF, Zaninotto ALC, Nagumo MM,  
18 Guirado VM de P, et al. Transcranial direct current stimulation for post-  
19 concussion syndrome: Study protocol for a randomized crossover trial. *Front*  
20 *Neurol*. 2017 May 2;8(MAY):164.  
21 63. James SL, Theadom A, Ellenbogen RG, Bannick MS, Montjoy-Venning W,  
22 Lucchesi LR, et al. Global, regional, and national burden of traumatic brain  
23 injury and spinal cord injury, 1990–2016: a systematic analysis for the Global  
24 Burden of Disease Study 2016. *Lancet Neurol*. 2019 Jan 1;18(1):56–87.  
25 64. Jourdan C, Bayen E, Pradat-Diehl P, Ghout I, Darnoux E, Azerad S, et al. A  
26 comprehensive picture of 4-year outcome of severe brain injuries. Results from  
27 the Paris-TBI study. *Ann Phys Rehabil Med* [Internet]. 2016;59(2):100–6.  
28 Available from: <http://dx.doi.org/10.1016/j.rehab.2015.10.009>  
29 65. Zec RF, Zellers D, Belman J, Miller J, Matthews J, Ferneau-Belman D, et al.  
30 Long-term consequences of severe closed head injury on episodic memory. *J*  
31 *Clin Exp Neuropsychol*. 2001;23(5):671–91.  
32 66. Zaninotto AL, El-Hagrassy MM, Green JR, Babo M, Paglioni VM, Guerra  
33 Benute G, et al. Transcranial direct current stimulation (tDCS) effects on  
34 traumatic brain injury (TBI) recovery A systematic review. *Dement*  
35 *Neuropsychol* [Internet]. 2019 [cited 2019 Jul 2];13(2):172–9. Available from:  
36 <http://dx.doi.org/10.1590/1980-57642018dn13-020005>  
37 67. Miniussi C, Ruzzoli M. Transcranial stimulation and cognition. In: Lozano AM,  
38 Hallett M, editors. *Handbook of Clinical Neurology* [Internet]. 1st ed. Elsevier  
39 B.V.; 2013. p. 739–50. Available from: [http://dx.doi.org/10.1016/B978-0-444-](http://dx.doi.org/10.1016/B978-0-444-53497-2.00056-5)  
40 [53497-2.00056-5](http://dx.doi.org/10.1016/B978-0-444-53497-2.00056-5)  
41 68. Galli G, Vadillo MA, Sirota M, Feurra M, Medvedeva A. A systematic review  
42 and meta-analysis of the effects of transcranial direct current stimulation (tDCS)  
43 on episodic memory. *Brain Stimul* [Internet]. 2019;12(2):231–41. Available  
44 from: <https://doi.org/10.1016/j.brs.2018.11.008>  
45 69. Strickland TL, Depalma RG, Golanov E, Timmer ML, Jacobs B, Schonherr MC,  
46 et al. The Spectrum of Long-Term Behavioral Disturbances and Provided Care  
47 After Traumatic Brain Injury. *Front Neurol* | [www.frontiersin.org](http://www.frontiersin.org) [Internet].  
48 2020;1:246. Available from: [www.frontiersin.org](http://www.frontiersin.org)  
49 70. Azouvi P, Arnould A, Dromer E, Vallat-Azouvi C. Neuropsychology of  
50 traumatic brain injury: An expert overview. Vol. 173, *Revue Neurologique*.  
51 Elsevier Masson SAS; 2017. p. 461–72.  
52 71. De Almeida CER, De Sousa Filho JL, Dourado JC, Gontijo PAM, Dellaretti MA,

1  
2  
3 Costa BS. Traumatic Brain Injury Epidemiology in Brazil. World Neurosurg  
4 [Internet]. 2016;87:540–7. Available from:  
5 <http://dx.doi.org/10.1016/j.wneu.2015.10.020>  
6  
7  
8  
9  
10  
11  
12  
13  
14  
15  
16  
17  
18  
19  
20  
21  
22  
23  
24  
25  
26  
27  
28  
29  
30  
31  
32  
33  
34  
35  
36  
37  
38  
39  
40  
41  
42  
43  
44  
45  
46  
47  
48  
49  
50  
51  
52  
53  
54  
55  
56  
57  
58  
59  
60

For peer review only

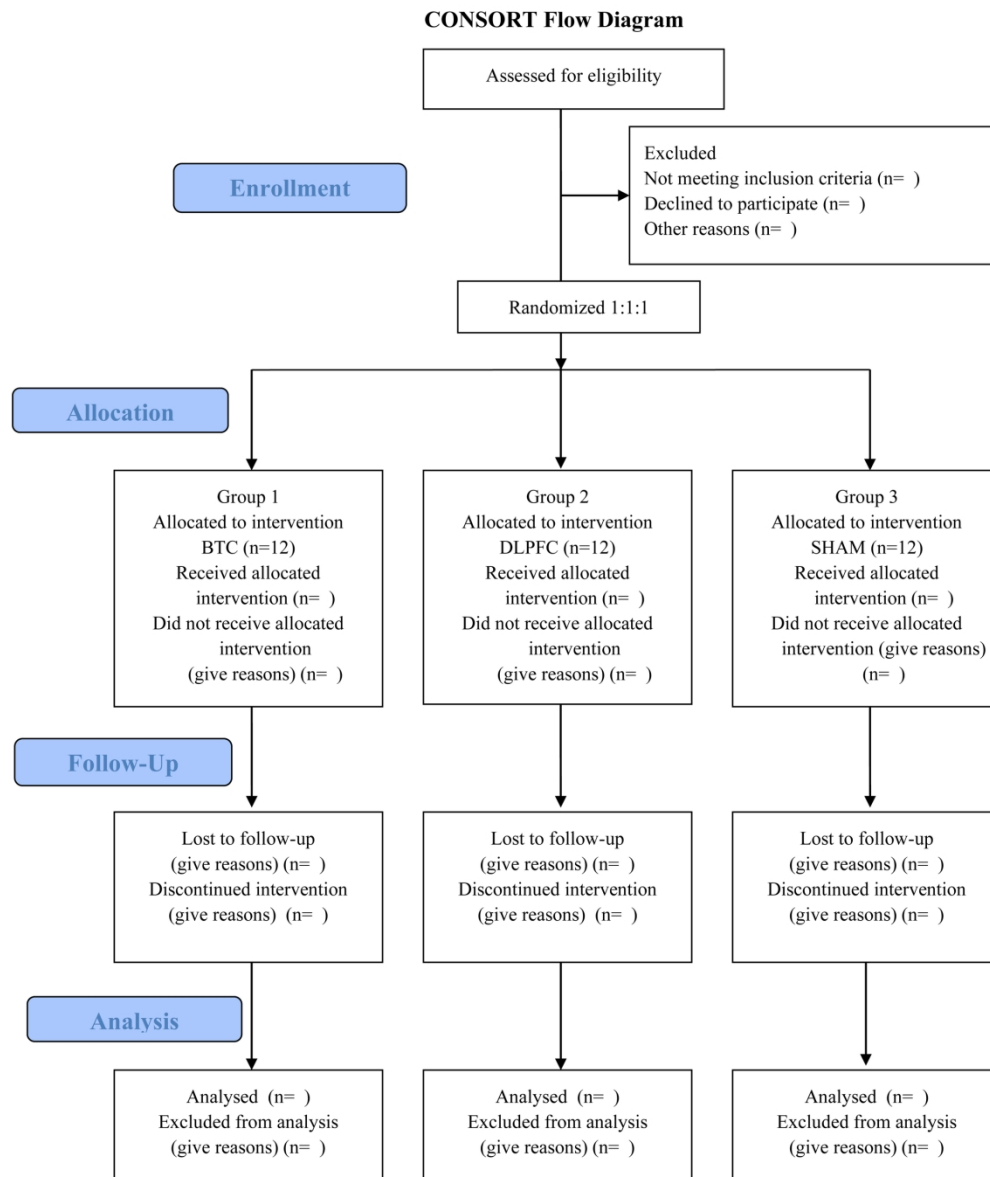

Figure 1 CONSORT Flow Diagram

184x219mm (300 x 300 DPI)

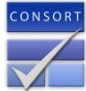

## CONSORT 2010 checklist of information to include when reporting a randomised trial\*

| Section/Topic                    | Item No | Checklist item: The effects of transcranial direct current stimulation (tDCS) and cognitive training on episodic memory in patients with traumatic brain injury: a double-blind, randomized, placebo-controlled study | Reported on page No |
|----------------------------------|---------|-----------------------------------------------------------------------------------------------------------------------------------------------------------------------------------------------------------------------|---------------------|
| <b>Title and abstract</b>        |         |                                                                                                                                                                                                                       |                     |
|                                  | 1a      | Identification as a randomised trial in the title                                                                                                                                                                     | 1                   |
|                                  | 1b      | Structured summary of trial design, methods, results, and conclusions (for specific guidance see CONSORT for abstracts)                                                                                               | 2                   |
| <b>Introduction</b>              |         |                                                                                                                                                                                                                       |                     |
| Background and objectives        | 2a      | Scientific background and explanation of rationale                                                                                                                                                                    | 4-6                 |
|                                  | 2b      | Specific objectives or hypotheses                                                                                                                                                                                     | 6                   |
| <b>Methods</b>                   |         |                                                                                                                                                                                                                       |                     |
| Trial design                     | 3a      | Description of trial design (such as parallel, factorial) including allocation ratio                                                                                                                                  | 6                   |
|                                  | 3b      | Important changes to methods after trial commencement (such as eligibility criteria), with reasons                                                                                                                    | n/a                 |
| Participants                     | 4a      | Eligibility criteria for participants                                                                                                                                                                                 | 8                   |
|                                  | 4b      | Settings and locations where the data were collected                                                                                                                                                                  | 6                   |
| Interventions                    | 5       | The interventions for each group with sufficient details to allow replication, including how and when they were actually administered                                                                                 | 10-11               |
| Outcomes                         | 6a      | Completely defined pre-specified primary and secondary outcome measures, including how and when they were assessed                                                                                                    | 9-10                |
|                                  | 6b      | Any changes to trial outcomes after the trial commenced, with reasons                                                                                                                                                 | n/a                 |
| Sample size                      | 7a      | How sample size was determined                                                                                                                                                                                        | 11-12               |
|                                  | 7b      | When applicable, explanation of any interim analyses and stopping guidelines                                                                                                                                          | n/a                 |
| <b>Randomisation:</b>            |         |                                                                                                                                                                                                                       |                     |
| Sequence generation              | 8a      | Method used to generate the random allocation sequence                                                                                                                                                                | 7                   |
|                                  | 8b      | Type of randomisation; details of any restriction (such as blocking and block size)                                                                                                                                   | 7                   |
| Allocation concealment mechanism | 9       | Mechanism used to implement the random allocation sequence (such as sequentially numbered containers), describing any steps taken to conceal the sequence until interventions were assigned                           | 7                   |
| Implementation                   | 10      | Who generated the random allocation sequence, who enrolled participants, and who assigned participants to interventions                                                                                               | 7                   |



|    |                          |     |                                                                                                                                          |     |
|----|--------------------------|-----|------------------------------------------------------------------------------------------------------------------------------------------|-----|
| 1  | Blinding                 | 11a | If done, who was blinded after assignment to interventions (for example, participants, care providers, those assessing outcomes) and how | 7   |
| 2  |                          |     |                                                                                                                                          |     |
| 3  |                          | 11b | If relevant, description of the similarity of interventions                                                                              | 7   |
| 4  | Statistical methods      | 12a | Statistical methods used to compare groups for primary and secondary outcomes                                                            | 12  |
| 5  |                          | 12b | Methods for additional analyses, such as subgroup analyses and adjusted analyses                                                         | n/a |
| 6  |                          |     |                                                                                                                                          |     |
| 7  | <b>Results</b>           |     |                                                                                                                                          |     |
| 8  | Participant flow (a      | 13a | For each group, the numbers of participants who were randomly assigned, received intended treatment, and                                 | n/a |
| 9  | diagram is strongly      |     | were analysed for the primary outcome                                                                                                    |     |
| 10 | recommended)             | 13b | For each group, losses and exclusions after randomisation, together with reasons                                                         | n/a |
| 11 | Recruitment              | 14a | Dates defining the periods of recruitment and follow-up                                                                                  | n/a |
| 12 |                          | 14b | Why the trial ended or was stopped                                                                                                       | n/a |
| 13 |                          |     |                                                                                                                                          |     |
| 14 | Baseline data            | 15  | A table showing baseline demographic and clinical characteristics for each group                                                         | n/a |
| 15 | Numbers analysed         | 16  | For each group, number of participants (denominator) included in each analysis and whether the analysis was                              | n/a |
| 16 |                          |     | by original assigned groups                                                                                                              |     |
| 17 |                          |     |                                                                                                                                          |     |
| 18 | Outcomes and             | 17a | For each primary and secondary outcome, results for each group, and the estimated effect size and its                                    | n/a |
| 19 | estimation               |     | precision (such as 95% confidence interval)                                                                                              |     |
| 20 |                          | 17b | For binary outcomes, presentation of both absolute and relative effect sizes is recommended                                              | n/a |
| 21 | Ancillary analyses       | 18  | Results of any other analyses performed, including subgroup analyses and adjusted analyses, distinguishing                               | n/a |
| 22 |                          |     | pre-specified from exploratory                                                                                                           |     |
| 23 |                          |     |                                                                                                                                          |     |
| 24 | Harms                    | 19  | All important harms or unintended effects in each group (for specific guidance see CONSORT for harms)                                    | n/a |
| 25 |                          |     |                                                                                                                                          |     |
| 26 | <b>Discussion</b>        |     |                                                                                                                                          |     |
| 27 | Limitations              | 20  | Trial limitations, addressing sources of potential bias, imprecision, and, if relevant, multiplicity of analyses                         | 14  |
| 28 | Generalisability         | 21  | Generalisability (external validity, applicability) of the trial findings                                                                | 14  |
| 29 | Interpretation           | 22  | Interpretation consistent with results, balancing benefits and harms, and considering other relevant evidence                            | n/a |
| 30 |                          |     |                                                                                                                                          |     |
| 31 | <b>Other information</b> |     |                                                                                                                                          |     |
| 32 | Registration             | 23  | Registration number and name of trial registry                                                                                           | 15  |
| 33 | Protocol                 | 24  | Where the full trial protocol can be accessed, if available                                                                              | 15  |
| 34 | Funding                  | 25  | Sources of funding and other support (such as supply of drugs), role of funders                                                          | 16  |
| 35 |                          |     |                                                                                                                                          |     |
| 36 |                          |     |                                                                                                                                          |     |

37  
38  
39 \*We strongly recommend reading this statement in conjunction with the CONSORT 2010 Explanation and Elaboration for important clarifications on all the items. If relevant, we also  
40 recommend reading CONSORT extensions for cluster randomised trials, non-inferiority and equivalence trials, non-pharmacological treatments, herbal interventions, and pragmatic trials.  
41 Additional extensions are forthcoming: for those and for up to date references relevant to this checklist, see [www.consort-statement.org](http://www.consort-statement.org).  
42

# Reporting checklist for protocol of a clinical trial.

Based on the SPIRIT guidelines.

## Instructions to authors

Complete this checklist by entering the page numbers from your manuscript where readers will find each of the items listed below.

Your article may not currently address all the items on the checklist. Please modify your text to include the missing information. If you are certain that an item does not apply, please write "n/a" and provide a short explanation.

Upload your completed checklist as an extra file when you submit to a journal.

In your methods section, say that you used the SPIRIT reporting guidelines, and cite them as:

Chan A-W, Tetzlaff JM, Altman DG, Laupacis A, Gøtzsche PC, Krleža-Jerić K, Hróbjartsson A, Mann H, Dickersin K, Berlin J, Doré C, Parulekar W, Summerskill W, Groves T, Schulz K, Sox H, Rockhold FW, Rennie D, Moher D. SPIRIT 2013 Statement: Defining standard protocol items for clinical trials. *Ann Intern Med.* 2013;158(3):200-207

|                                   | Reporting Item                                                                                                                  | Page Number |
|-----------------------------------|---------------------------------------------------------------------------------------------------------------------------------|-------------|
| <b>Administrative information</b> |                                                                                                                                 |             |
| Title                             | <a href="#">#1</a> Descriptive title identifying the study design, population, interventions, and, if applicable, trial acronym | 1           |

|    |                          |                     |                                                              |     |
|----|--------------------------|---------------------|--------------------------------------------------------------|-----|
| 1  | Trial registration       | <a href="#">#2a</a> | Trial identifier and registry name. If not yet registered,   | 2   |
| 2  |                          |                     |                                                              |     |
| 3  |                          |                     | name of intended registry                                    |     |
| 4  |                          |                     |                                                              |     |
| 5  |                          |                     |                                                              |     |
| 6  | Trial registration: data | <a href="#">#2b</a> | All items from the World Health Organization Trial           | 14  |
| 7  |                          |                     |                                                              |     |
| 8  | set                      |                     | Registration Data Set                                        |     |
| 9  |                          |                     |                                                              |     |
| 10 |                          |                     |                                                              |     |
| 11 | Protocol version         | <a href="#">#3</a>  | Date and version identifier                                  | n/a |
| 12 |                          |                     |                                                              |     |
| 13 |                          |                     |                                                              |     |
| 14 |                          |                     |                                                              |     |
| 15 | Funding                  | <a href="#">#4</a>  | Sources and types of financial, material, and other support  | 15  |
| 16 |                          |                     |                                                              |     |
| 17 |                          |                     |                                                              |     |
| 18 | Roles and                | <a href="#">#5a</a> | Names, affiliations, and roles of protocol contributors      | 15  |
| 19 |                          |                     |                                                              |     |
| 20 | responsibilities:        |                     |                                                              |     |
| 21 |                          |                     |                                                              |     |
| 22 | contributorship          |                     |                                                              |     |
| 23 |                          |                     |                                                              |     |
| 24 |                          |                     |                                                              |     |
| 25 |                          |                     |                                                              |     |
| 26 | Roles and                | <a href="#">#5b</a> | Name and contact information for the trial sponsor           | n/a |
| 27 |                          |                     |                                                              |     |
| 28 | responsibilities:        |                     |                                                              |     |
| 29 |                          |                     |                                                              |     |
| 30 | sponsor contact          |                     |                                                              |     |
| 31 |                          |                     |                                                              |     |
| 32 | information              |                     |                                                              |     |
| 33 |                          |                     |                                                              |     |
| 34 |                          |                     |                                                              |     |
| 35 |                          |                     |                                                              |     |
| 36 | Roles and                | <a href="#">#5c</a> | Role of study sponsor and funders, if any, in study design;  | 15  |
| 37 |                          |                     |                                                              |     |
| 38 | responsibilities:        |                     | collection, management, analysis, and interpretation of      |     |
| 39 |                          |                     |                                                              |     |
| 40 | sponsor and funder       |                     | data; writing of the report; and the decision to submit the  |     |
| 41 |                          |                     |                                                              |     |
| 42 |                          |                     | report for publication, including whether they will have     |     |
| 43 |                          |                     |                                                              |     |
| 44 |                          |                     | ultimate authority over any of these activities              |     |
| 45 |                          |                     |                                                              |     |
| 46 |                          |                     |                                                              |     |
| 47 |                          |                     |                                                              |     |
| 48 | Roles and                | <a href="#">#5d</a> | Composition, roles, and responsibilities of the coordinating | 7   |
| 49 |                          |                     |                                                              |     |
| 50 | responsibilities:        |                     | centre, steering committee, endpoint adjudication            |     |
| 51 |                          |                     |                                                              |     |
| 52 | committees               |                     | committee, data management team, and other individuals       |     |
| 53 |                          |                     |                                                              |     |
| 54 |                          |                     | or groups overseeing the trial, if applicable (see Item 21a  |     |
| 55 |                          |                     |                                                              |     |
| 56 |                          |                     | for data monitoring committee)                               |     |
| 57 |                          |                     |                                                              |     |
| 58 |                          |                     |                                                              |     |
| 59 |                          |                     |                                                              |     |
| 60 |                          |                     |                                                              |     |

1 **Introduction**  
2  
3

4 **Background and** [#6a](#) Description of research question and justification for 4-6  
5  
6 rationale undertaking the trial, including summary of relevant studies  
7 (published and unpublished) examining benefits and harms  
8 for each intervention  
9  
10  
11  
12

14 **Background and** [#6b](#) Explanation for choice of comparators 4-6  
15  
16 rationale: choice of  
17 comparators  
18  
19  
20

22 **Objectives** [#7](#) Specific objectives or hypotheses 6  
23  
24

25 **Trial design** [#8](#) Description of trial design including type of trial (eg, parallel 6  
26 group, crossover, factorial, single group), allocation ratio,  
27 and framework (eg, superiority, equivalence, non-inferiority,  
28 exploratory)  
29  
30  
31  
32  
33  
34

35 **Methods:**  
36

37 **Participants,**  
38  
39 **interventions, and**  
40  
41 **outcomes**  
42  
43

45 **Study setting** [#9](#) Description of study settings (eg, community clinic, 7  
46 academic hospital) and list of countries where data will be  
47 collected. Reference to where list of study sites can be  
48 obtained  
49  
50  
51  
52  
53

54 **Eligibility criteria** [#10](#) Inclusion and exclusion criteria for participants. If 7-8  
55 applicable, eligibility criteria for study centres and  
56  
57  
58  
59  
60

|    |                      |                                                                                   |       |
|----|----------------------|-----------------------------------------------------------------------------------|-------|
| 1  |                      | individuals who will perform the interventions (eg,                               |       |
| 2  |                      |                                                                                   |       |
| 3  |                      | surgeons, psychotherapists)                                                       |       |
| 4  |                      |                                                                                   |       |
| 5  |                      |                                                                                   |       |
| 6  | Interventions:       | <a href="#">#11a</a> Interventions for each group with sufficient detail to allow | 10-11 |
| 7  |                      |                                                                                   |       |
| 8  | description          | replication, including how and when they will be                                  |       |
| 9  |                      |                                                                                   |       |
| 10 |                      | administered                                                                      |       |
| 11 |                      |                                                                                   |       |
| 12 |                      |                                                                                   |       |
| 13 | Interventions:       | <a href="#">#11b</a> Criteria for discontinuing or modifying allocated            | n/a   |
| 14 |                      |                                                                                   |       |
| 15 | modifications        | interventions for a given trial participant (eg, drug dose                        |       |
| 16 |                      |                                                                                   |       |
| 17 |                      | change in response to harms, participant request, or                              |       |
| 18 |                      |                                                                                   |       |
| 19 |                      | improving / worsening disease)                                                    |       |
| 20 |                      |                                                                                   |       |
| 21 |                      |                                                                                   |       |
| 22 |                      |                                                                                   |       |
| 23 | Interventions:       | <a href="#">#11c</a> Strategies to improve adherence to intervention protocols,   | n/a   |
| 24 |                      |                                                                                   |       |
| 25 | adherence            | and any procedures for monitoring adherence (eg, drug                             |       |
| 26 |                      |                                                                                   |       |
| 27 |                      | tablet return; laboratory tests)                                                  |       |
| 28 |                      |                                                                                   |       |
| 29 |                      |                                                                                   |       |
| 30 |                      |                                                                                   |       |
| 31 | Interventions:       | <a href="#">#11d</a> Relevant concomitant care and interventions that are         | n/a   |
| 32 |                      |                                                                                   |       |
| 33 | concomitant care     | permitted or prohibited during the trial                                          |       |
| 34 |                      |                                                                                   |       |
| 35 |                      |                                                                                   |       |
| 36 | Outcomes             | <a href="#">#12</a> Primary, secondary, and other outcomes, including the         | 9     |
| 37 |                      |                                                                                   |       |
| 38 |                      | specific measurement variable (eg, systolic blood                                 |       |
| 39 |                      |                                                                                   |       |
| 40 |                      | pressure), analysis metric (eg, change from baseline, final                       |       |
| 41 |                      |                                                                                   |       |
| 42 |                      | value, time to event), method of aggregation (eg, median,                         |       |
| 43 |                      |                                                                                   |       |
| 44 |                      | proportion), and time point for each outcome. Explanation                         |       |
| 45 |                      |                                                                                   |       |
| 46 |                      | of the clinical relevance of chosen efficacy and harm                             |       |
| 47 |                      |                                                                                   |       |
| 48 |                      | outcomes is strongly recommended                                                  |       |
| 49 |                      |                                                                                   |       |
| 50 |                      |                                                                                   |       |
| 51 |                      |                                                                                   |       |
| 52 |                      |                                                                                   |       |
| 53 | Participant timeline | <a href="#">#13</a> Time schedule of enrolment, interventions (including any      | 8     |
| 54 |                      |                                                                                   |       |
| 55 |                      | run-ins and washouts), assessments, and visits for                                |       |
| 56 |                      |                                                                                   |       |
| 57 |                      | participants. A schematic diagram is highly recommended                           |       |
| 58 |                      |                                                                                   |       |
| 59 |                      |                                                                                   |       |
| 60 |                      |                                                                                   |       |

(see Figure)

|    |                              |                      |                                                              |
|----|------------------------------|----------------------|--------------------------------------------------------------|
| 1  |                              |                      |                                                              |
| 2  |                              |                      |                                                              |
| 3  |                              |                      |                                                              |
| 4  | Sample size                  | <a href="#">#14</a>  | Estimated number of participants needed to achieve study 11  |
| 5  |                              |                      |                                                              |
| 6  |                              |                      | objectives and how it was determined, including clinical and |
| 7  |                              |                      |                                                              |
| 8  |                              |                      | statistical assumptions supporting any sample size           |
| 9  |                              |                      |                                                              |
| 10 |                              |                      | calculations                                                 |
| 11 |                              |                      |                                                              |
| 12 |                              |                      |                                                              |
| 13 | Recruitment                  | <a href="#">#15</a>  | Strategies for achieving adequate participant enrolment to 7 |
| 14 |                              |                      |                                                              |
| 15 |                              |                      |                                                              |
| 16 |                              |                      | reach target sample size                                     |
| 17 |                              |                      |                                                              |
| 18 |                              |                      |                                                              |
| 19 | <b>Methods: Assignment</b>   |                      |                                                              |
| 20 |                              |                      |                                                              |
| 21 | <b>of interventions (for</b> |                      |                                                              |
| 22 |                              |                      |                                                              |
| 23 | <b>controlled trials)</b>    |                      |                                                              |
| 24 |                              |                      |                                                              |
| 25 |                              |                      |                                                              |
| 26 | Allocation: sequence         | <a href="#">#16a</a> | Method of generating the allocation sequence (eg, 7          |
| 27 |                              |                      |                                                              |
| 28 | generation                   |                      | computer-generated random numbers), and list of any          |
| 29 |                              |                      |                                                              |
| 30 |                              |                      | factors for stratification. To reduce predictability of a    |
| 31 |                              |                      |                                                              |
| 32 |                              |                      | random sequence, details of any planned restriction (eg,     |
| 33 |                              |                      |                                                              |
| 34 |                              |                      | blocking) should be provided in a separate document that is  |
| 35 |                              |                      |                                                              |
| 36 |                              |                      | unavailable to those who enrol participants or assign        |
| 37 |                              |                      |                                                              |
| 38 |                              |                      | interventions                                                |
| 39 |                              |                      |                                                              |
| 40 |                              |                      |                                                              |
| 41 |                              |                      |                                                              |
| 42 |                              |                      |                                                              |
| 43 | Allocation                   | <a href="#">#16b</a> | Mechanism of implementing the allocation sequence (eg, 7     |
| 44 |                              |                      |                                                              |
| 45 | concealment                  |                      | central telephone; sequentially numbered, opaque, sealed     |
| 46 |                              |                      |                                                              |
| 47 | mechanism                    |                      | envelopes), describing any steps to conceal the sequence     |
| 48 |                              |                      |                                                              |
| 49 |                              |                      | until interventions are assigned                             |
| 50 |                              |                      |                                                              |
| 51 |                              |                      |                                                              |
| 52 |                              |                      |                                                              |
| 53 | Allocation:                  | <a href="#">#16c</a> | Who will generate the allocation sequence, who will enrol 7  |
| 54 |                              |                      |                                                              |
| 55 | implementation               |                      | participants, and who will assign participants to            |
| 56 |                              |                      |                                                              |
| 57 |                              |                      | interventions                                                |
| 58 |                              |                      |                                                              |
| 59 |                              |                      |                                                              |
| 60 |                              |                      |                                                              |

|    |                        |                      |                                                                |     |
|----|------------------------|----------------------|----------------------------------------------------------------|-----|
| 1  | Blinding (masking)     | <a href="#">#17a</a> | Who will be blinded after assignment to interventions (eg,     | 7   |
| 2  |                        |                      | trial participants, care providers, outcome assessors, data    |     |
| 3  |                        |                      | analysts), and how                                             |     |
| 4  |                        |                      |                                                                |     |
| 5  |                        |                      |                                                                |     |
| 6  |                        |                      |                                                                |     |
| 7  |                        |                      |                                                                |     |
| 8  | Blinding (masking):    | <a href="#">#17b</a> | If blinded, circumstances under which unblinding is            | 7   |
| 9  | emergency              |                      | permissible, and procedure for revealing a participant's       |     |
| 10 |                        |                      | allocated intervention during the trial                        |     |
| 11 | unblinding             |                      |                                                                |     |
| 12 |                        |                      |                                                                |     |
| 13 |                        |                      |                                                                |     |
| 14 |                        |                      |                                                                |     |
| 15 |                        |                      |                                                                |     |
| 16 | <b>Methods: Data</b>   |                      |                                                                |     |
| 17 | <b>collection,</b>     |                      |                                                                |     |
| 18 | <b>management, and</b> |                      |                                                                |     |
| 19 | <b>analysis</b>        |                      |                                                                |     |
| 20 |                        |                      |                                                                |     |
| 21 |                        |                      |                                                                |     |
| 22 |                        |                      |                                                                |     |
| 23 |                        |                      |                                                                |     |
| 24 |                        |                      |                                                                |     |
| 25 |                        |                      |                                                                |     |
| 26 | Data collection plan   | <a href="#">#18a</a> | Plans for assessment and collection of outcome, baseline,      | 9   |
| 27 |                        |                      | and other trial data, including any related processes to       |     |
| 28 |                        |                      | promote data quality (eg, duplicate measurements, training     |     |
| 29 |                        |                      | of assessors) and a description of study instruments (eg,      |     |
| 30 |                        |                      | questionnaires, laboratory tests) along with their reliability |     |
| 31 |                        |                      | and validity, if known. Reference to where data collection     |     |
| 32 |                        |                      | forms can be found, if not in the protocol                     |     |
| 33 |                        |                      |                                                                |     |
| 34 |                        |                      |                                                                |     |
| 35 |                        |                      |                                                                |     |
| 36 |                        |                      |                                                                |     |
| 37 |                        |                      |                                                                |     |
| 38 |                        |                      |                                                                |     |
| 39 |                        |                      |                                                                |     |
| 40 |                        |                      |                                                                |     |
| 41 |                        |                      |                                                                |     |
| 42 |                        |                      |                                                                |     |
| 43 | Data collection plan:  | <a href="#">#18b</a> | Plans to promote participant retention and complete follow-    | n/a |
| 44 | retention              |                      | up, including list of any outcome data to be collected for     |     |
| 45 |                        |                      | participants who discontinue or deviate from intervention      |     |
| 46 |                        |                      | protocols                                                      |     |
| 47 |                        |                      |                                                                |     |
| 48 |                        |                      |                                                                |     |
| 49 |                        |                      |                                                                |     |
| 50 |                        |                      |                                                                |     |
| 51 |                        |                      |                                                                |     |
| 52 |                        |                      |                                                                |     |
| 53 | Data management        | <a href="#">#19</a>  | Plans for data entry, coding, security, and storage,           | 12  |
| 54 |                        |                      | including any related processes to promote data quality        |     |
| 55 |                        |                      | (eg, double data entry; range checks for data values).         |     |
| 56 |                        |                      |                                                                |     |
| 57 |                        |                      |                                                                |     |
| 58 |                        |                      |                                                                |     |
| 59 |                        |                      |                                                                |     |
| 60 |                        |                      |                                                                |     |

|    |                            |                                                                                  |     |
|----|----------------------------|----------------------------------------------------------------------------------|-----|
| 1  |                            | Reference to where details of data management                                    |     |
| 2  |                            |                                                                                  |     |
| 3  |                            | procedures can be found, if not in the protocol                                  |     |
| 4  |                            |                                                                                  |     |
| 5  |                            |                                                                                  |     |
| 6  | Statistics: outcomes       | <a href="#">#20a</a> Statistical methods for analysing primary and secondary     | 11  |
| 7  |                            |                                                                                  |     |
| 8  |                            | outcomes. Reference to where other details of the                                |     |
| 9  |                            |                                                                                  |     |
| 10 |                            | statistical analysis plan can be found, if not in the protocol                   |     |
| 11 |                            |                                                                                  |     |
| 12 |                            |                                                                                  |     |
| 13 | Statistics: additional     | <a href="#">#20b</a> Methods for any additional analyses (eg, subgroup and       | 11  |
| 14 |                            |                                                                                  |     |
| 15 | analyses                   | adjusted analyses)                                                               |     |
| 16 |                            |                                                                                  |     |
| 17 |                            |                                                                                  |     |
| 18 | Statistics: analysis       | <a href="#">#20c</a> Definition of analysis population relating to protocol non- | 11  |
| 19 |                            |                                                                                  |     |
| 20 | population and             | adherence (eg, as randomised analysis), and any statistical                      |     |
| 21 |                            |                                                                                  |     |
| 22 | missing data               | methods to handle missing data (eg, multiple imputation)                         |     |
| 23 |                            |                                                                                  |     |
| 24 |                            |                                                                                  |     |
| 25 |                            |                                                                                  |     |
| 26 | <b>Methods: Monitoring</b> |                                                                                  |     |
| 27 |                            |                                                                                  |     |
| 28 |                            |                                                                                  |     |
| 29 | Data monitoring:           | <a href="#">#21a</a> Composition of data monitoring committee (DMC);             | 7   |
| 30 |                            |                                                                                  |     |
| 31 | formal committee           | summary of its role and reporting structure; statement of                        |     |
| 32 |                            |                                                                                  |     |
| 33 |                            | whether it is independent from the sponsor and competing                         |     |
| 34 |                            |                                                                                  |     |
| 35 |                            | interests; and reference to where further details about its                      |     |
| 36 |                            |                                                                                  |     |
| 37 |                            | charter can be found, if not in the protocol. Alternatively, an                  |     |
| 38 |                            |                                                                                  |     |
| 39 |                            | explanation of why a DMC is not needed                                           |     |
| 40 |                            |                                                                                  |     |
| 41 |                            |                                                                                  |     |
| 42 |                            |                                                                                  |     |
| 43 |                            |                                                                                  |     |
| 44 | Data monitoring:           | <a href="#">#21b</a> Description of any interim analyses and stopping            | n/a |
| 45 |                            |                                                                                  |     |
| 46 | interim analysis           | guidelines, including who will have access to these interim                      |     |
| 47 |                            |                                                                                  |     |
| 48 |                            | results and make the final decision to terminate the trial                       |     |
| 49 |                            |                                                                                  |     |
| 50 |                            |                                                                                  |     |
| 51 | Harms                      | <a href="#">#22</a> Plans for collecting, assessing, reporting, and managing     | 12  |
| 52 |                            |                                                                                  |     |
| 53 |                            | solicited and spontaneously reported adverse events and                          |     |
| 54 |                            |                                                                                  |     |
| 55 |                            | other unintended effects of trial interventions or trial                         |     |
| 56 |                            |                                                                                  |     |
| 57 |                            |                                                                                  |     |
| 58 |                            |                                                                                  |     |
| 59 |                            |                                                                                  |     |
| 60 |                            |                                                                                  |     |



|    |                      |                                                                                  |     |
|----|----------------------|----------------------------------------------------------------------------------|-----|
| 1  |                      | conduct                                                                          |     |
| 2  |                      |                                                                                  |     |
| 3  |                      |                                                                                  |     |
| 4  | Auditing             | <a href="#">#23</a> Frequency and procedures for auditing trial conduct, if any, | 7   |
| 5  |                      |                                                                                  |     |
| 6  |                      | and whether the process will be independent from                                 |     |
| 7  |                      |                                                                                  |     |
| 8  |                      | investigators and the sponsor                                                    |     |
| 9  |                      |                                                                                  |     |
| 10 |                      |                                                                                  |     |
| 11 | <b>Ethics and</b>    |                                                                                  |     |
| 12 |                      |                                                                                  |     |
| 13 | <b>dissemination</b> |                                                                                  |     |
| 14 |                      |                                                                                  |     |
| 15 |                      |                                                                                  |     |
| 16 | Research ethics      | <a href="#">#24</a> Plans for seeking research ethics committee / institutional  | 7   |
| 17 |                      |                                                                                  |     |
| 18 | approval             | review board (REC / IRB) approval                                                |     |
| 19 |                      |                                                                                  |     |
| 20 |                      |                                                                                  |     |
| 21 |                      |                                                                                  |     |
| 22 | Protocol             | <a href="#">#25</a> Plans for communicating important protocol modifications     | n/a |
| 23 |                      |                                                                                  |     |
| 24 | amendments           | (eg, changes to eligibility criteria, outcomes, analyses) to                     |     |
| 25 |                      |                                                                                  |     |
| 26 |                      | relevant parties (eg, investigators, REC / IRBs, trial                           |     |
| 27 |                      |                                                                                  |     |
| 28 |                      | participants, trial registries, journals, regulators)                            |     |
| 29 |                      |                                                                                  |     |
| 30 |                      |                                                                                  |     |
| 31 |                      |                                                                                  |     |
| 32 | Consent or assent    | <a href="#">#26a</a> Who will obtain informed consent or assent from potential   | 15  |
| 33 |                      |                                                                                  |     |
| 34 |                      | trial participants or authorised surrogates, and how (see                        |     |
| 35 |                      |                                                                                  |     |
| 36 |                      | Item 32)                                                                         |     |
| 37 |                      |                                                                                  |     |
| 38 |                      |                                                                                  |     |
| 39 | Consent or assent:   | <a href="#">#26b</a> Additional consent provisions for collection and use of     | n/a |
| 40 |                      |                                                                                  |     |
| 41 | ancillary studies    | participant data and biological specimens in ancillary                           |     |
| 42 |                      |                                                                                  |     |
| 43 |                      | studies, if applicable                                                           |     |
| 44 |                      |                                                                                  |     |
| 45 |                      |                                                                                  |     |
| 46 |                      |                                                                                  |     |
| 47 | Confidentiality      | <a href="#">#27</a> How personal information about potential and enrolled        | 12  |
| 48 |                      |                                                                                  |     |
| 49 |                      | participants will be collected, shared, and maintained in                        |     |
| 50 |                      |                                                                                  |     |
| 51 |                      | order to protect confidentiality before, during, and after the                   |     |
| 52 |                      |                                                                                  |     |
| 53 |                      | trial                                                                            |     |
| 54 |                      |                                                                                  |     |
| 55 |                      |                                                                                  |     |
| 56 |                      |                                                                                  |     |
| 57 | Declaration of       | <a href="#">#28</a> Financial and other competing interests for principal        | 15  |
| 58 |                      |                                                                                  |     |
| 59 |                      |                                                                                  |     |
| 60 |                      |                                                                                  |     |

|    |                       |                      |                                                                 |     |
|----|-----------------------|----------------------|-----------------------------------------------------------------|-----|
| 1  | interests             |                      | investigators for the overall trial and each study site         |     |
| 2  |                       |                      |                                                                 |     |
| 3  |                       |                      |                                                                 |     |
| 4  | Data access           | <a href="#">#29</a>  | Statement of who will have access to the final trial dataset,   | 15  |
| 5  |                       |                      | and disclosure of contractual agreements that limit such        |     |
| 6  |                       |                      | access for investigators                                        |     |
| 7  |                       |                      |                                                                 |     |
| 8  |                       |                      |                                                                 |     |
| 9  |                       |                      |                                                                 |     |
| 10 |                       |                      |                                                                 |     |
| 11 | Ancillary and post    | <a href="#">#30</a>  | Provisions, if any, for ancillary and post-trial care, and for  | n/a |
| 12 |                       |                      | compensation to those who suffer harm from trial                |     |
| 13 | trial care            |                      | participation                                                   |     |
| 14 |                       |                      |                                                                 |     |
| 15 |                       |                      |                                                                 |     |
| 16 |                       |                      |                                                                 |     |
| 17 |                       |                      |                                                                 |     |
| 18 |                       |                      |                                                                 |     |
| 19 | Dissemination policy: | <a href="#">#31a</a> | Plans for investigators and sponsor to communicate trial        | 14  |
| 20 |                       |                      | results to participants, healthcare professionals, the public,  |     |
| 21 | trial results         |                      | and other relevant groups (eg, via publication, reporting in    |     |
| 22 |                       |                      | results databases, or other data sharing arrangements),         |     |
| 23 |                       |                      | including any publication restrictions                          |     |
| 24 |                       |                      |                                                                 |     |
| 25 |                       |                      |                                                                 |     |
| 26 |                       |                      |                                                                 |     |
| 27 |                       |                      |                                                                 |     |
| 28 |                       |                      |                                                                 |     |
| 29 |                       |                      |                                                                 |     |
| 30 |                       |                      |                                                                 |     |
| 31 | Dissemination policy: | <a href="#">#31b</a> | Authorship eligibility guidelines and any intended use of       | n/a |
| 32 |                       |                      | professional writers                                            |     |
| 33 | authorship            |                      |                                                                 |     |
| 34 |                       |                      |                                                                 |     |
| 35 |                       |                      |                                                                 |     |
| 36 | Dissemination policy: | <a href="#">#31c</a> | Plans, if any, for granting public access to the full protocol, | 15  |
| 37 |                       |                      | participant-level dataset, and statistical code                 |     |
| 38 | reproducible research |                      |                                                                 |     |
| 39 |                       |                      |                                                                 |     |
| 40 |                       |                      |                                                                 |     |
| 41 |                       |                      |                                                                 |     |
| 42 | <b>Appendices</b>     |                      |                                                                 |     |
| 43 |                       |                      |                                                                 |     |
| 44 |                       |                      |                                                                 |     |
| 45 | Informed consent      | <a href="#">#32</a>  | Model consent form and other related documentation given        | n/a |
| 46 |                       |                      | to participants and authorised surrogates                       |     |
| 47 | materials             |                      |                                                                 |     |
| 48 |                       |                      |                                                                 |     |
| 49 |                       |                      |                                                                 |     |
| 50 | Biological specimens  | <a href="#">#33</a>  | Plans for collection, laboratory evaluation, and storage of     | n/a |
| 51 |                       |                      | biological specimens for genetic or molecular analysis in       |     |
| 52 |                       |                      | the current trial and for future use in ancillary studies, if   |     |
| 53 |                       |                      | applicable                                                      |     |
| 54 |                       |                      |                                                                 |     |
| 55 |                       |                      |                                                                 |     |
| 56 |                       |                      |                                                                 |     |
| 57 |                       |                      |                                                                 |     |
| 58 |                       |                      |                                                                 |     |
| 59 |                       |                      |                                                                 |     |
| 60 |                       |                      |                                                                 |     |

1 None The SPIRIT checklist is distributed under the terms of the Creative Commons Attribution  
2  
3 License CC-BY-ND 3.0. This checklist can be completed online using <https://www.goodreports.org/>, a  
4  
5 tool made by the [EQUATOR Network](#) in collaboration with [Penelope.ai](#)  
6  
7  
8  
9  
10  
11  
12  
13  
14  
15  
16  
17  
18  
19  
20  
21  
22  
23  
24  
25  
26  
27  
28  
29  
30  
31  
32  
33  
34  
35  
36  
37  
38  
39  
40  
41  
42  
43  
44  
45  
46  
47  
48  
49  
50  
51  
52  
53  
54  
55  
56  
57  
58  
59  
60

For peer review only
